# Supplementary material
Source: publisher figshare collection journal article supplement (https://karger.figshare.com/articles/dataset/_/5126857)
Supplement: Supplementary file 1 [file 1]

Archive with 4 entries (4 files):
- 000365589_sm_Figure_1.pdf
- 000365589_sm_Figure_2.pdf
- 000365589_sm_Legends.PDF
- 000365589_sm_Table_1.PDF
