# Supplementary material
Source: publisher figshare collection journal article supplement (https://karger.figshare.com/articles/dataset/_/5126857)
Supplement: Supplementary file 1 [file 1 › 000365589_sm_Table_1.PDF]

## METAINFO

---

### GENE-SET

---

REACTOME\_PRESYNAPTIC\_NICOTINIC\_ACETYLCHOLINE\_RECEPTORS  
REACTOME\_ACETYLCHOLINE\_BINDING\_AND\_DOWNSTREAM\_EVENTS  
  
REACTOME\_HIGHLY\_CALCIIUM\_PERMEABLE\_POSTSYNAPTIC\_NICOTINIC\_ACETYLCHOLINE\_RECEPTORS  
REACTOME\_TRANSMISSION\_ACROSS\_CHEMICAL\_SYNAPSES  
HOOI\_ST7\_TARGETS\_UP  
REACTOME\_NEUROTRANSMITTER\_RECEPTOR\_BINDING\_AND\_DOWNSTREAM\_TRANSMISSION\_IN\_  
THE\_POSTSYNAPTIC\_CELL  
NICOTINIC\_ACETYLCHOLINE\_ACTIVATED\_CATION\_SELECTIVE\_CHANNEL\_ACTIVITY  
NICOTINIC\_ACETYLCHOLINE\_GATED\_RECEPTOR\_CHANNEL\_COMPLEX  
REACTOME\_SIGNALING\_BY\_FGFR1\_FUSION\_MUTANTS  
REACTOME\_REGULATION\_OF\_SIGNALING\_BY\_CBL  
GSE12366\_GC\_BCELL\_VS\_PLASMA\_CELL\_UP  
NIKOLSKY\_BREAST\_CANCER\_15Q26\_AMPLICON  
AMINE\_BINDING  
GSE17721\_LPS\_VS\_CPG\_2H\_BMDM\_UP  
V\$FOXO3\_01  
SENESE\_HDAC2\_TARGETS\_UP  
KEGG\_OLFACTORY\_TRANSDUCTION  
SHETH\_LIVER\_CANCER\_VS\_TXNIP\_LOSS\_PAM1  
VANOEVERLEN\_MYOGENESIS\_SIN3A\_TARGETS  
KEGG\_FOCAL\_ADHESION  
ACETYLCHOLINE\_BINDING  
REACTOME\_NEURONAL\_SYSTEM  
BIOCARTA\_GLEEVEC\_PATHWAY  
CHIARADONNA\_NEOPLASTIC\_TRANSFORMATION\_KRAS\_CDC25\_DN  
FARMER\_BREAST\_CANCER\_CLUSTER\_8  
KEGG\_SYSTEMIC\_LUPUS\_ERYTHEMATOSUS  
GSE2706\_LPS\_VS\_R848\_AND\_LPS\_2H\_STIM\_DC\_DN  
KATSANOU\_ELAVL1\_TARGETS\_UP  
YAO\_TEMPORAL\_RESPONSE\_TO\_PROGESTERONE\_CLUSTER\_9  
REACTOME\_APC\_C\_CDH1\_MEDIATED\_DEGRADATION\_OF\_CDC20\_AND\_OTHER\_APC\_C\_CDH1\_  
TARGETED\_PROTEINS\_IN\_LATE\_MITOSIS\_EARLY\_G1  
REACTOME\_DESTABILIZATION\_OF\_MRNA\_BY\_AUF1\_HNRNP\_D0  
KANG\_AR\_TARGETS\_UP  
**NIKOLSKY\_BREAST\_CANCER\_16Q24\_AMPLICON**  
REACTOME\_SIGNALING\_BY\_HIPPO  
GSE36476\_CTRL\_VS\_TSST\_ACT\_16H\_MEMORY\_CD4\_TCELL\_OLD\_DN

POTASSIUM\_CHANNEL\_REGULATOR\_ACTIVITY

GCCNNNWTAAAR\_UNKNOWN

ZWANG\_EGF\_PERSISTENTLY\_UP

REACTOME\_CDT1\_ASSOCIATION\_WITH\_THE\_CDC6\_ORC\_ORIGIN\_COMPLEX

**V\$EGR1\_01**

MODY\_HIPPOCAMPUS\_POSTNATAL

GSE20366\_CD103\_POS\_VS\_CD103\_KLRG1\_DP\_TREG\_DN

---

| Discovery |           |           |              |              |           |           |               |               |               |               |
|-----------|-----------|-----------|--------------|--------------|-----------|-----------|---------------|---------------|---------------|---------------|
| N_all     | COPDGene  |           |              |              | GenKOLS   |           |               |               | Combined      |               |
|           | N         | Ncorr     | P            | Pcorr        | N         | Ncorr     | P             | Pcorr         | P             | Pcorr         |
| 12        | 12        | 9         | 3.2E-04      | 0.11         | 12        | 9         | 0.0066        | 0.12          | 2.8E-05       | 0.10          |
| 16        | 14        | 11        | 5.4E-04      | 0.11         | 14        | 11        | 0.0056        | 0.094         | 4.3E-05       | 0.088         |
| 13        | 11        | 8         | 0.0024       | 0.34         | 11        | 8         | 0.0055        | 0.12          | 2.1E-04       | 0.35          |
| 186       | 172       | 169       | 0.0029       | 0.015        | 172       | 169       | 0.0060        | 0.016         | 2.8E-04       | 0.0033        |
| 94        | 80        | 80        | 0.0050       | 0.0050       | 80        | 80        | 0.031         | 0.031         | 0.0016        | 0.0016        |
| 137       | 126       | 123       | 0.0053       | 0.032        | 126       | 123       | 0.016         | 0.043         | 0.0010        | 0.014         |
| 11        | 11        | 9         | 0.0083       | 0.268        | 11        | 9         | 0.016         | 0.11          | 0.0017        | 0.26          |
| 11        | 11        | 9         | 0.0083       | 0.268        | 11        | 9         | 0.016         | 0.11          | 0.0017        | 0.26          |
| 19        | 18        | 18        | 0.011        | 0.011        | 18        | 18        | 0.006         | 0.0059        | 0.0013        | 0.0013        |
| 18        | 18        | 18        | 0.012        | 0.012        | 18        | 18        | 0.035         | 0.035         | 0.0043        | 0.0043        |
| 200       | 177       | 177       | 0.013        | 0.013        | 177       | 177       | 0.0054        | 0.0054        | 0.0014        | 0.0014        |
| 22        | 21        | 21        | 0.014        | 0.014        | 21        | 21        | 0.0085        | 0.0085        | 0.0020        | 0.0020        |
| 23        | 21        | 18        | 0.015        | 0.340        | 21        | 18        | 0.027         | 0.19          | 0.0046        | 0.43          |
| 200       | 188       | 188       | 0.016        | 0.016        | 187       | 187       | 0.030         | 0.030         | 0.0052        | 0.0052        |
| 245       | 226       | 226       | 0.017        | 0.017        | 226       | 226       | 0.030         | 0.030         | 0.0054        | 0.0054        |
| 114       | 110       | 110       | 0.017        | 0.017        | 110       | 110       | 0.0040        | 0.0040        | 0.0016        | 0.0016        |
| 389       | 356       | 356       | 0.018        | 0.018        | 357       | 357       | 0.043         | 0.043         | 0.0078        | 0.0078        |
| 229       | 213       | 213       | 0.019        | 0.019        | 213       | 213       | 0.012         | 0.012         | 0.0035        | 0.0035        |
| 220       | 211       | 211       | 0.020        | 0.020        | 211       | 211       | 0.0075        | 0.0075        | 0.0028        | 0.0028        |
| 201       | 191       | 191       | 0.025        | 0.025        | 191       | 191       | 0.013         | 0.013         | 0.0052        | 0.0052        |
| 17        | 17        | 14        | 0.026        | 0.52         | 17        | 14        | 0.0086        | 0.104         | 0.0042        | 0.56          |
| 279       | 262       | 259       | 0.027        | 0.074        | 262       | 259       | 0.045         | 0.082         | 0.012         | 0.052         |
| 23        | 23        | 23        | 0.030        | 0.030        | 23        | 23        | 0.035         | 0.035         | 0.011         | 0.011         |
| 51        | 47        | 47        | 0.030        | 0.030        | 47        | 47        | 0.0085        | 0.0085        | 0.0050        | 0.0050        |
| 7         | 7         | 7         | 0.033        | 0.033        | 7         | 7         | 0.023         | 0.023         | 0.010         | 0.0099        |
| 140       | 121       | 121       | 0.034        | 0.034        | 122       | 122       | 0.050         | 0.050         | 0.016         | 0.016         |
| 200       | 137       | 136       | 0.034        | 0.058        | 137       | 136       | 0.0022        | 0.0032        | 0.003         | 0.0069        |
| 169       | 160       | 160       | 0.035        | 0.035        | 160       | 160       | 0.026         | 0.026         | 0.011         | 0.011         |
| 76        | 71        | 71        | 0.037        | 0.037        | 71        | 71        | 0.033         | 0.033         | 0.014         | 0.014         |
| 72        | 62        | 62        | 0.037        | 0.037        | 62        | 62        | 0.041         | 0.041         | 0.016         | 0.016         |
| 53        | 49        | 49        | 0.038        | 0.038        | 49        | 49        | 0.041         | 0.041         | 0.017         | 0.017         |
| 17        | 15        | 15        | 0.039        | 0.039        | 15        | 15        | 0.0030        | 0.0030        | 0.0039        | 0.0039        |
| <b>53</b> | <b>50</b> | <b>50</b> | <b>0.040</b> | <b>0.040</b> | <b>50</b> | <b>50</b> | <b>0.0092</b> | <b>0.0092</b> | <b>0.0073</b> | <b>0.0073</b> |
| 22        | 19        | 19        | 0.041        | 0.041        | 19        | 19        | 0.0071        | 0.0071        | 0.0065        | 0.0065        |
| 200       | 192       | 192       | 0.041        | 0.041        | 192       | 192       | 0.029         | 0.029         | 0.014         | 0.014         |

|            |            |            |              |              |            |            |               |               |               |               |
|------------|------------|------------|--------------|--------------|------------|------------|---------------|---------------|---------------|---------------|
| 14         | 13         | 13         | 0.042        | 0.042        | 13         | 13         | 0.0025        | 0.0025        | 0.0040        | 0.0040        |
| 149        | 134        | 134        | 0.042        | 0.042        | 134        | 134        | 0.028         | 0.028         | 0.015         | 0.015         |
| 32         | 29         | 29         | 0.045        | 0.045        | 29         | 29         | 0.0071        | 0.0071        | 0.0075        | 0.0075        |
| 56         | 53         | 53         | 0.046        | 0.046        | 53         | 53         | 0.047         | 0.047         | 0.022         | 0.022         |
| <b>269</b> | <b>251</b> | <b>251</b> | <b>0.047</b> | <b>0.047</b> | <b>251</b> | <b>251</b> | <b>0.0034</b> | <b>0.0034</b> | <b>0.0054</b> | <b>0.0053</b> |
| 63         | 58         | 58         | 0.049        | 0.049        | 58         | 58         | 0.046         | 0.046         | 0.023         | 0.023         |
| 200        | 187        | 187        | 0.049        | 0.048        | 187        | 187        | 0.045         | 0.045         | 0.023         | 0.022         |

---

| Replication |           |               |               |
|-------------|-----------|---------------|---------------|
| ECLIPSE     |           |               |               |
| N           | Ncorr     | P             | Pcorr         |
| 12          | 9         | 0.87          | 0.96          |
| 14          | 11        | 0.84          | 0.94          |
| 11          | 8         | 0.75          | 0.90          |
| 172         | 169       | 0.46          | 0.50          |
| 80          | 80        | 0.79          | 0.79          |
| 126         | 123       | 0.68          | 0.73          |
| 11          | 9         | 0.92          | 0.96          |
| 11          | 9         | 0.92          | 0.96          |
| 18          | 18        | 0.69          | 0.69          |
| 18          | 18        | 0.15          | 0.15          |
| 177         | 177       | 0.94          | 0.94          |
| 21          | 21        | 0.076         | 0.076         |
| 21          | 18        | 0.44          | 0.57          |
| 188         | 188       | 0.52          | 0.52          |
| 226         | 226       | 0.032         | 0.031         |
| 110         | 110       | 0.26          | 0.26          |
| 359         | 359       | 0.83          | 0.82          |
| 213         | 213       | 0.43          | 0.43          |
| 212         | 212       | 0.54          | 0.54          |
| 191         | 191       | 0.15          | 0.15          |
| 17          | 14        | 0.62          | 0.76          |
| 262         | 259       | 0.93          | 0.94          |
| 23          | 23        | 0.31          | 0.31          |
| 47          | 47        | 0.59          | 0.59          |
| 7           | 7         | 0.22          | 0.22          |
| 122         | 122       | 0.70          | 0.69          |
| 137         | 136       | 0.39          | 0.39          |
| 160         | 160       | 0.69          | 0.69          |
| 71          | 71        | 0.22          | 0.22          |
| 62          | 62        | 0.43          | 0.43          |
| 49          | 49        | 0.39          | 0.39          |
| 15          | 15        | 0.14          | 0.14          |
| <b>50</b>   | <b>50</b> | <b>0.0062</b> | <b>0.0062</b> |
| 19          | 19        | 0.95          | 0.95          |
| 192         | 192       | 0.30          | 0.30          |

|            |            |              |              |
|------------|------------|--------------|--------------|
| 13         | 13         | 0.92         | 0.92         |
| 134        | 134        | 0.17         | 0.16         |
| 29         | 29         | 0.88         | 0.88         |
| 53         | 53         | 0.32         | 0.32         |
| <b>251</b> | <b>251</b> | <b>0.022</b> | <b>0.021</b> |
| 58         | 58         | 0.29         | 0.28         |
| 187        | 187        | 0.90         | 0.90         |

---

| METAINFO      |           |                 |                 |           | Discovery      |                |           |
|---------------|-----------|-----------------|-----------------|-----------|----------------|----------------|-----------|
|               |           |                 |                 |           | COPDGene       |                |           |
| GENE          | CHR       | START           | STOP            | N         | Min P          | Gene P         | N         |
| CHRNA1        | 2         | 175612320       | 175629200       | 37        | 0.17           | 0.50           | 36        |
| CHRNA2        | 8         | 27317279        | 27337400        | 71        | 0.042          | 0.84           | 71        |
| <b>CHRNA3</b> | <b>15</b> | <b>78885394</b> | <b>78913637</b> | <b>54</b> | <b>1.3E-08</b> | <b>1.7E-05</b> | <b>54</b> |
| CHRNA4        | 20        | 61975420        | 62009753        | 36        | 0.048          | 0.80           | 35        |
| <b>CHRNA5</b> | <b>15</b> | <b>78857862</b> | <b>78887611</b> | <b>44</b> | <b>4.7E-08</b> | <b>0.0011</b>  | <b>44</b> |
| CHRNA2        | 1         | 154540257       | 154552502       | 22        | 0.15           | 0.41           | 22        |
| CHRNA3        | 8         | 42552519        | 42592550        | 37        | 0.012          | 0.18           | 38        |
| <b>CHRNA4</b> | <b>15</b> | <b>78916461</b> | <b>79012628</b> | <b>81</b> | <b>1.3E-08</b> | <b>1.0E-06</b> | <b>82</b> |
| CHRNA5        | 2         | 233390703       | 233401377       | 25        | 0.018          | 0.16           | 25        |
| CHRNA6        | 17        | 4801069         | 4806369         | 19        | 0.012          | 0.067          | 19        |
| CHRNA7        | 2         | 233404437       | 233412546       | 29        | 0.013          | 0.063          | 29        |
| CHRNA8        | 8         | 42607763        | 42651535        | 28        | 0.022          | 0.085          | 30        |

| v |         |        |          | Replication |       |        |
|---|---------|--------|----------|-------------|-------|--------|
|   | GenKOLS |        | Combined | ECLIPSE     |       |        |
|   | Min P   | Gene P | Gene P   | N           | Min P | Gene P |
|   | 0.10    | 0.50   | 0.99     | 39          | 0.075 | 0.16   |
|   | 3.4E-04 | 0.33   | 0.51     | 75          | 0.010 | 0.86   |
|   | 3.8E-04 | 0.0027 | 6.5E-07  | 60          | 0.059 | 0.17   |
|   | 0.073   | 0.74   | 0.29     | 36          | 0.068 | 0.70   |
|   | 2.6E-04 | 0.0093 | 1.3E-04  | 52          | 0.059 | 0.25   |
|   | 0.078   | 0.23   | 0.58     | 23          | 0.093 | 0.79   |
|   | 0.052   | 0.079  | 0.14     | 39          | 0.17  | 0.57   |
|   | 7.1E-04 | 0.0080 | 1.0E-07  | 86          | 0.16  | 0.52   |
|   | 0.078   | 0.21   | 0.21     | 27          | 0.12  | 0.96   |
|   | 0.030   | 0.50   | 0.19     | 20          | 0.17  | 0.89   |
|   | 0.078   | 0.33   | 0.12     | 33          | 0.11  | 0.43   |
|   | 0.038   | 0.15   | 0.089    | 32          | 0.077 | 1      |
