# Supplementary material
Source: publisher figshare collection journal article supplement (https://karger.figshare.com/articles/dataset/_/5126857)

**A**

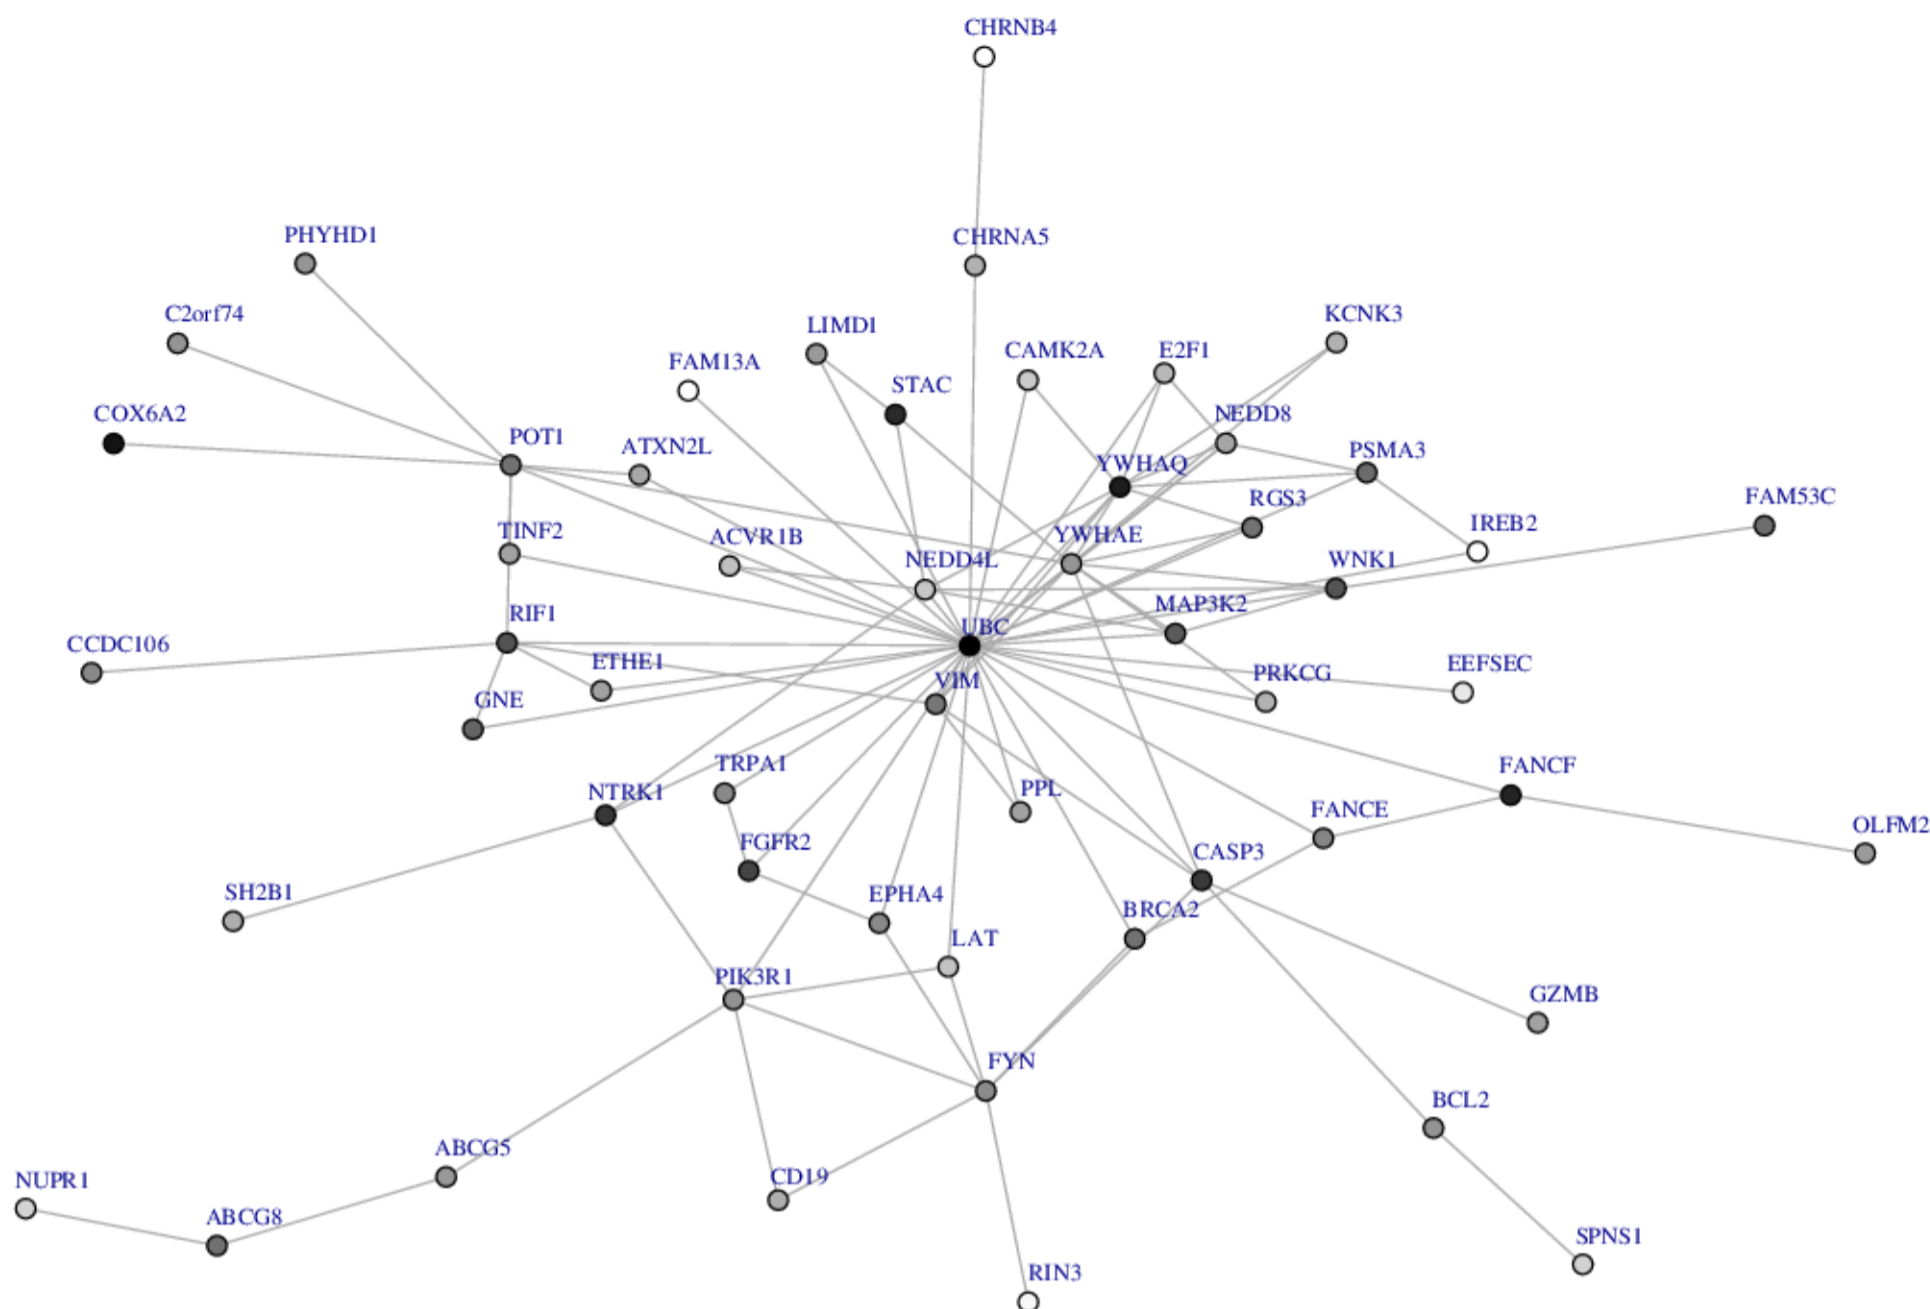

B

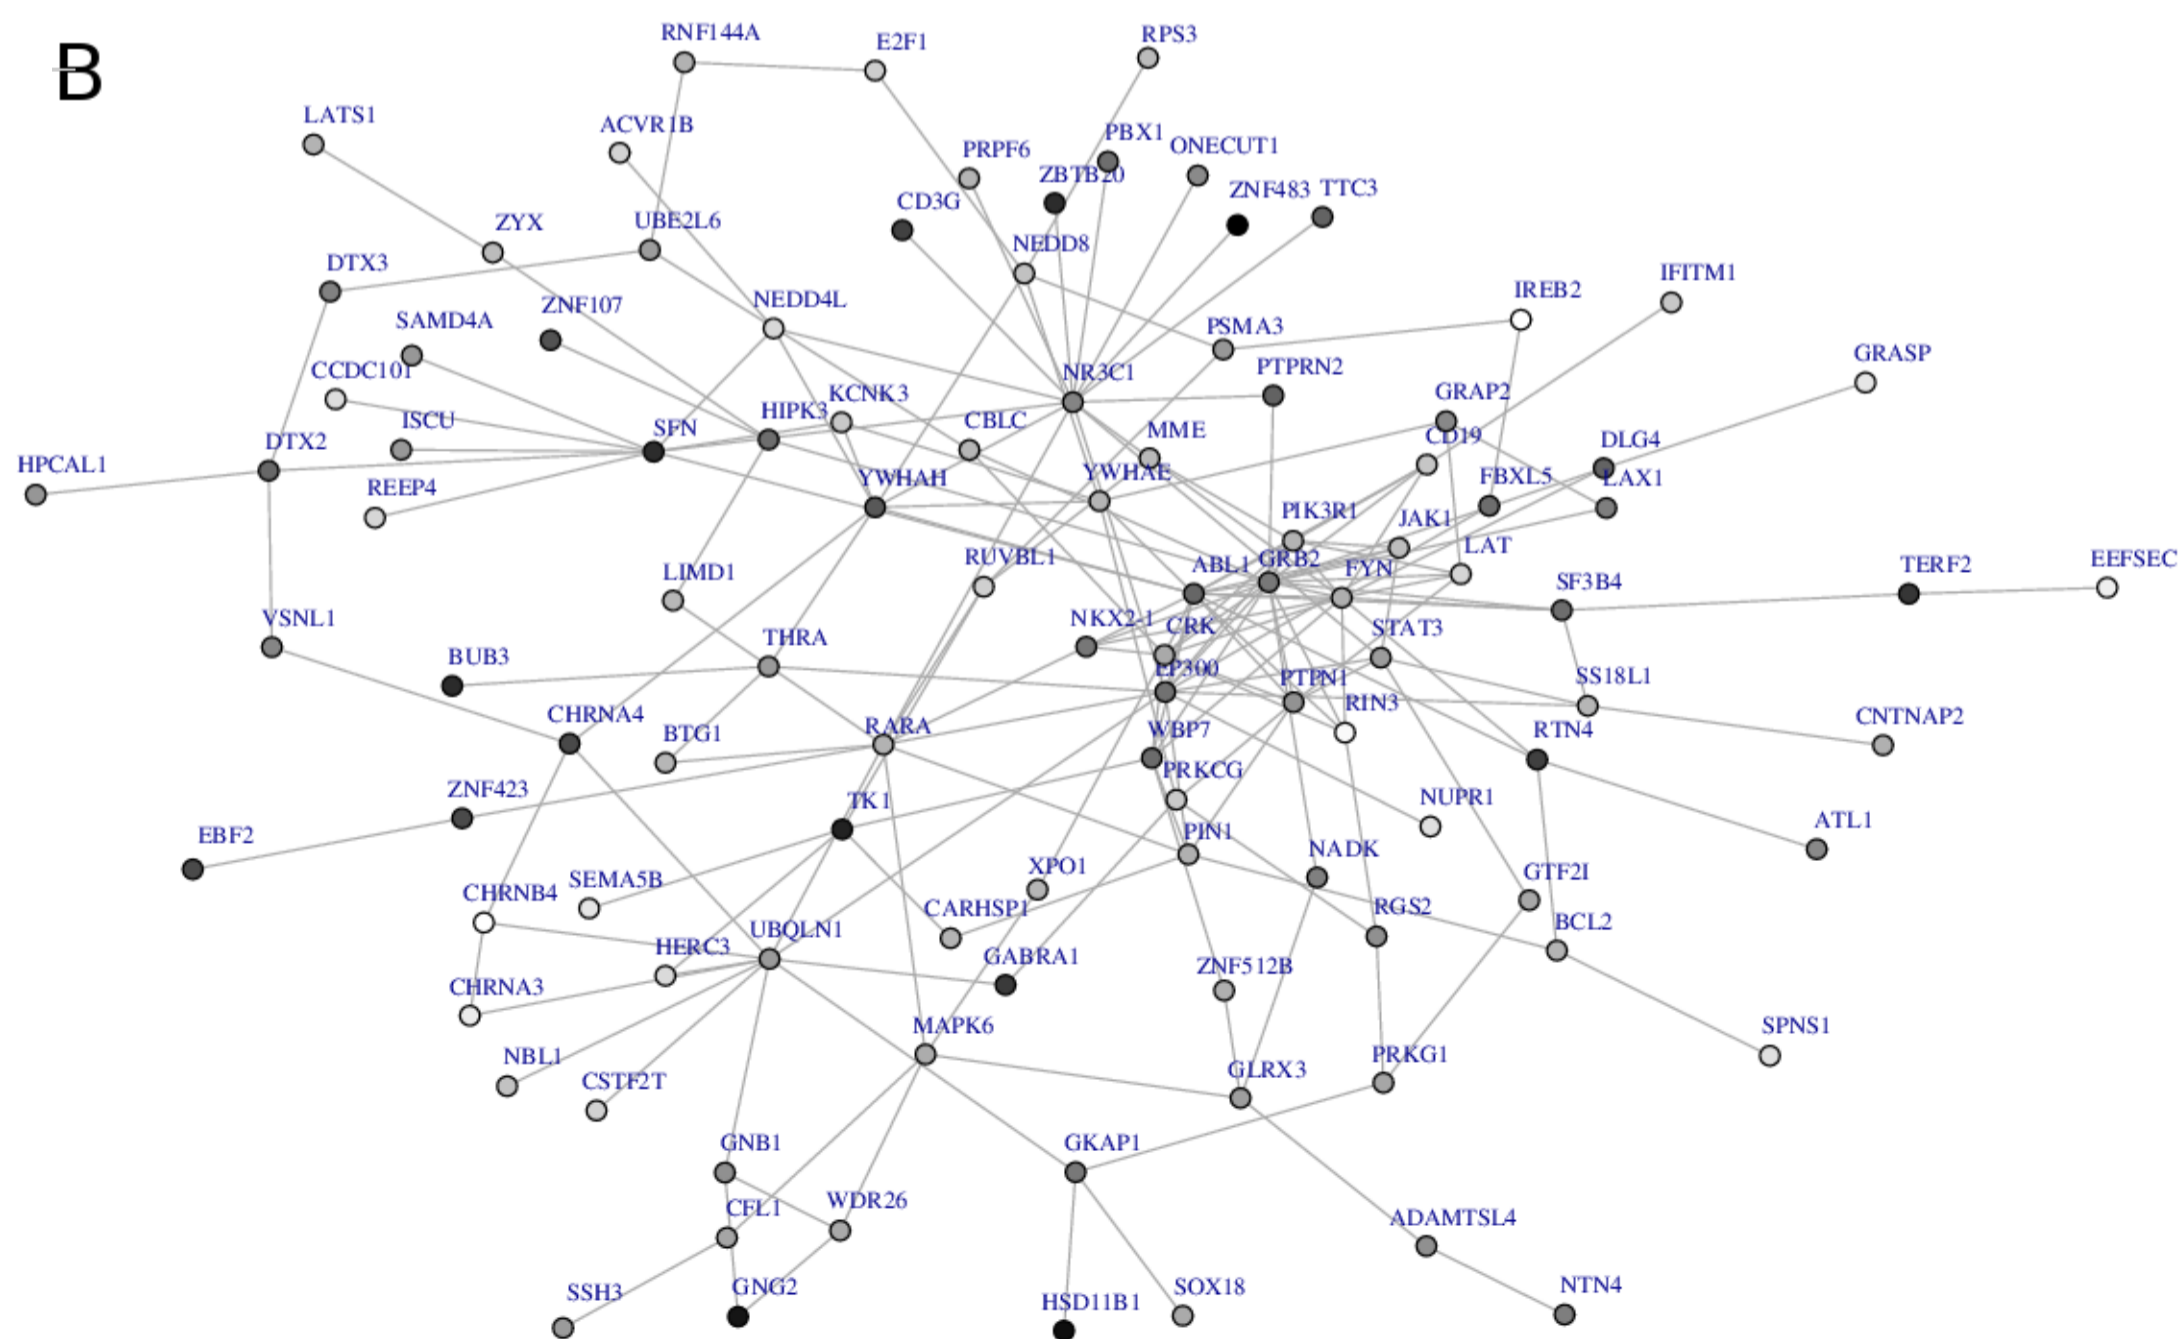

Supplement: Supplementary file 1 [file 1 › 000365589_sm_Figure_1.pdf]

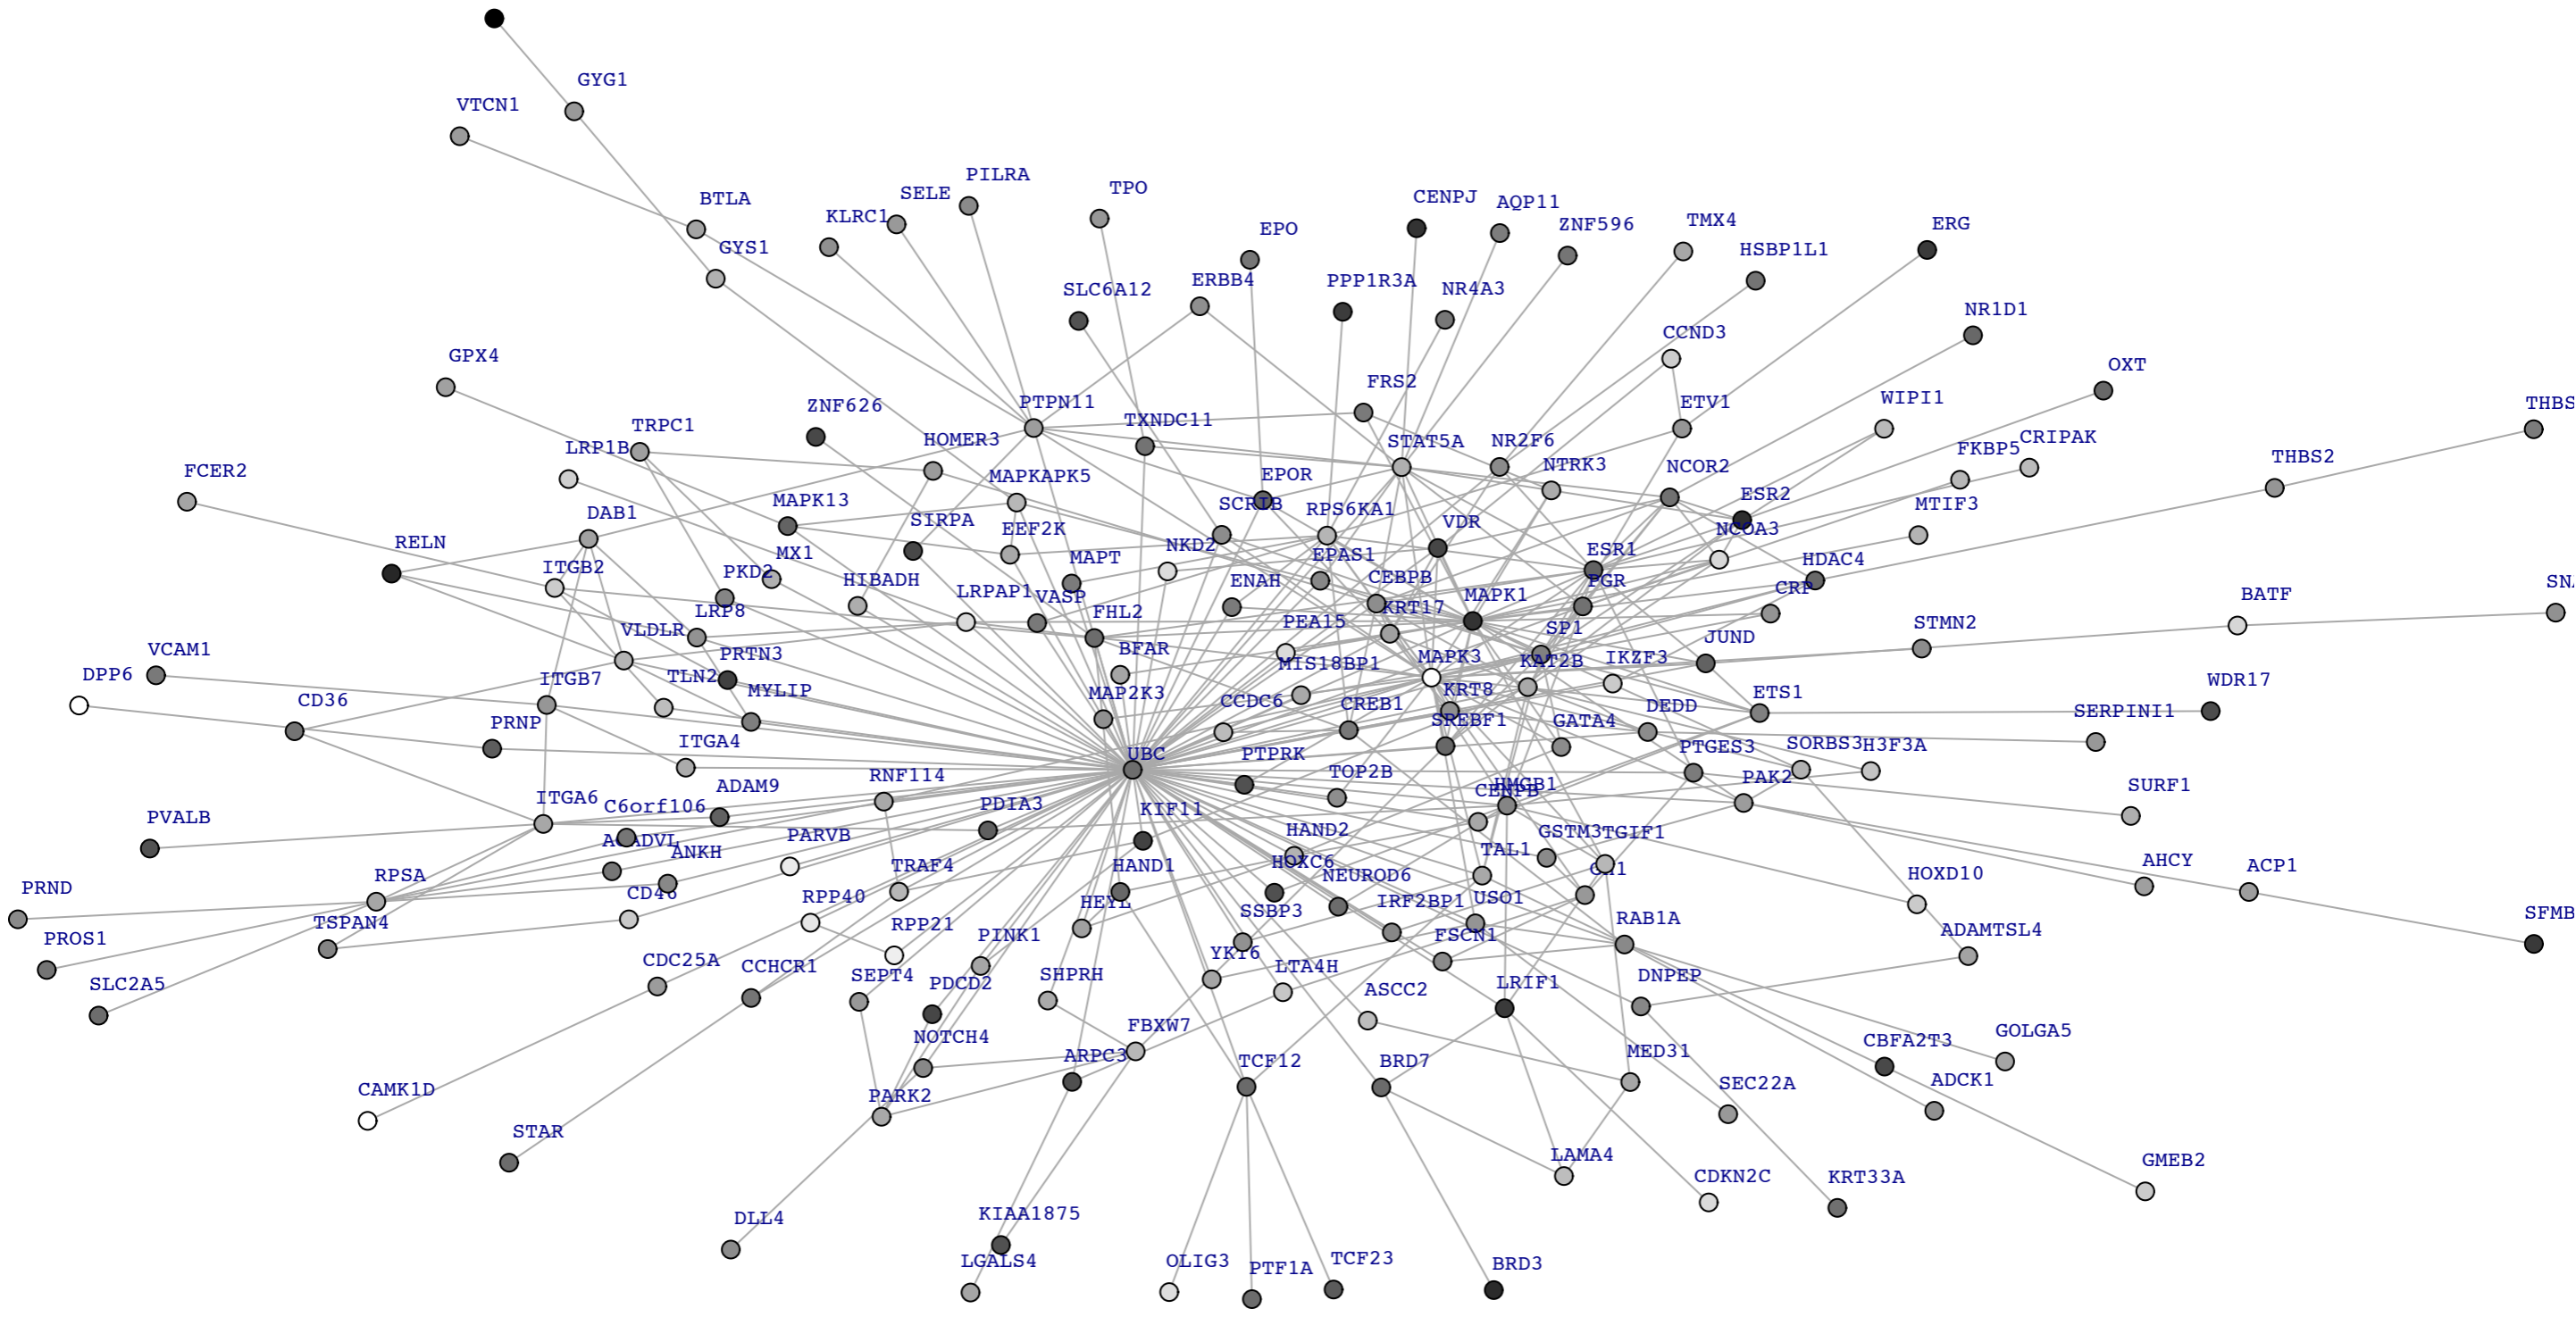

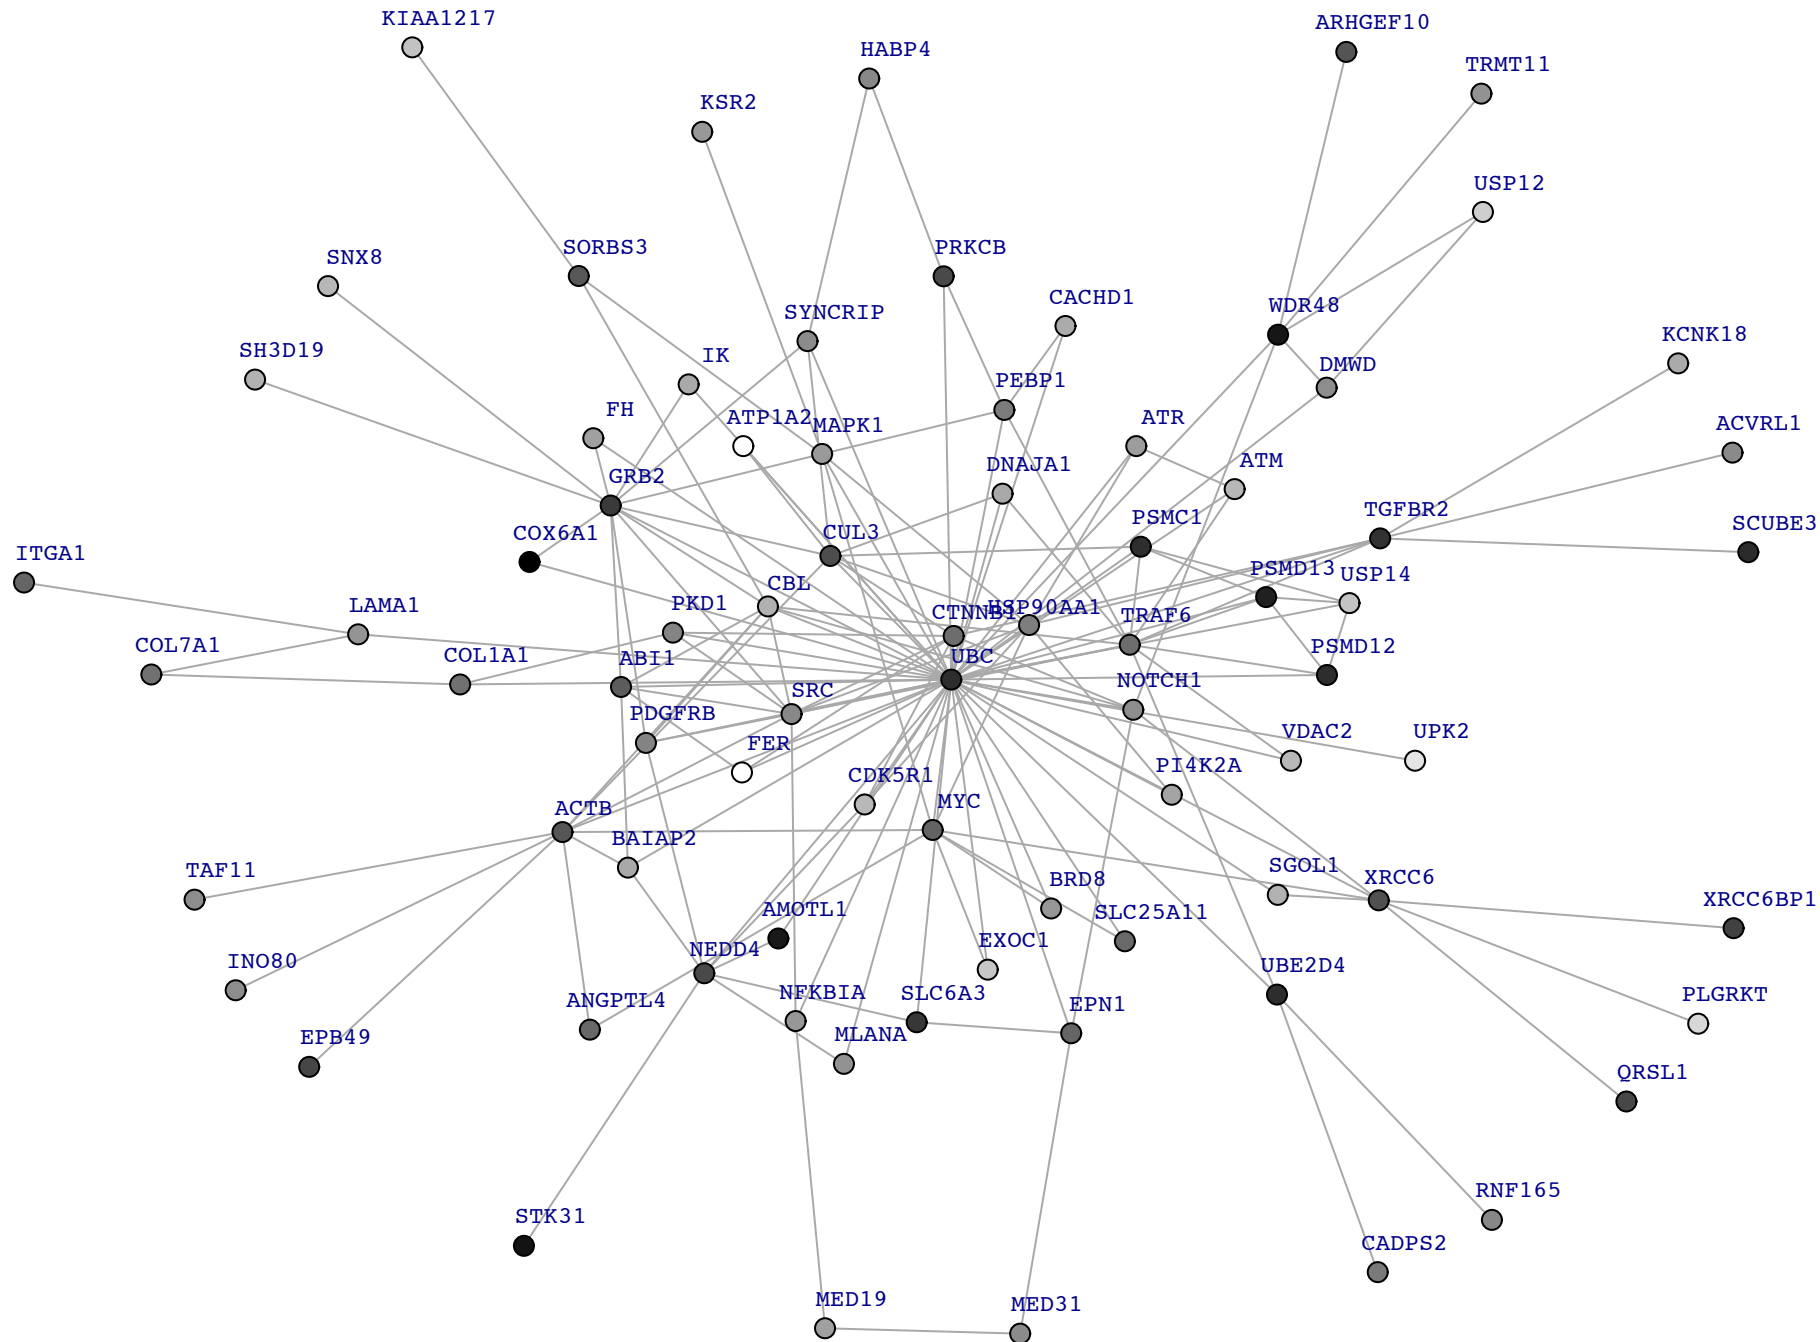

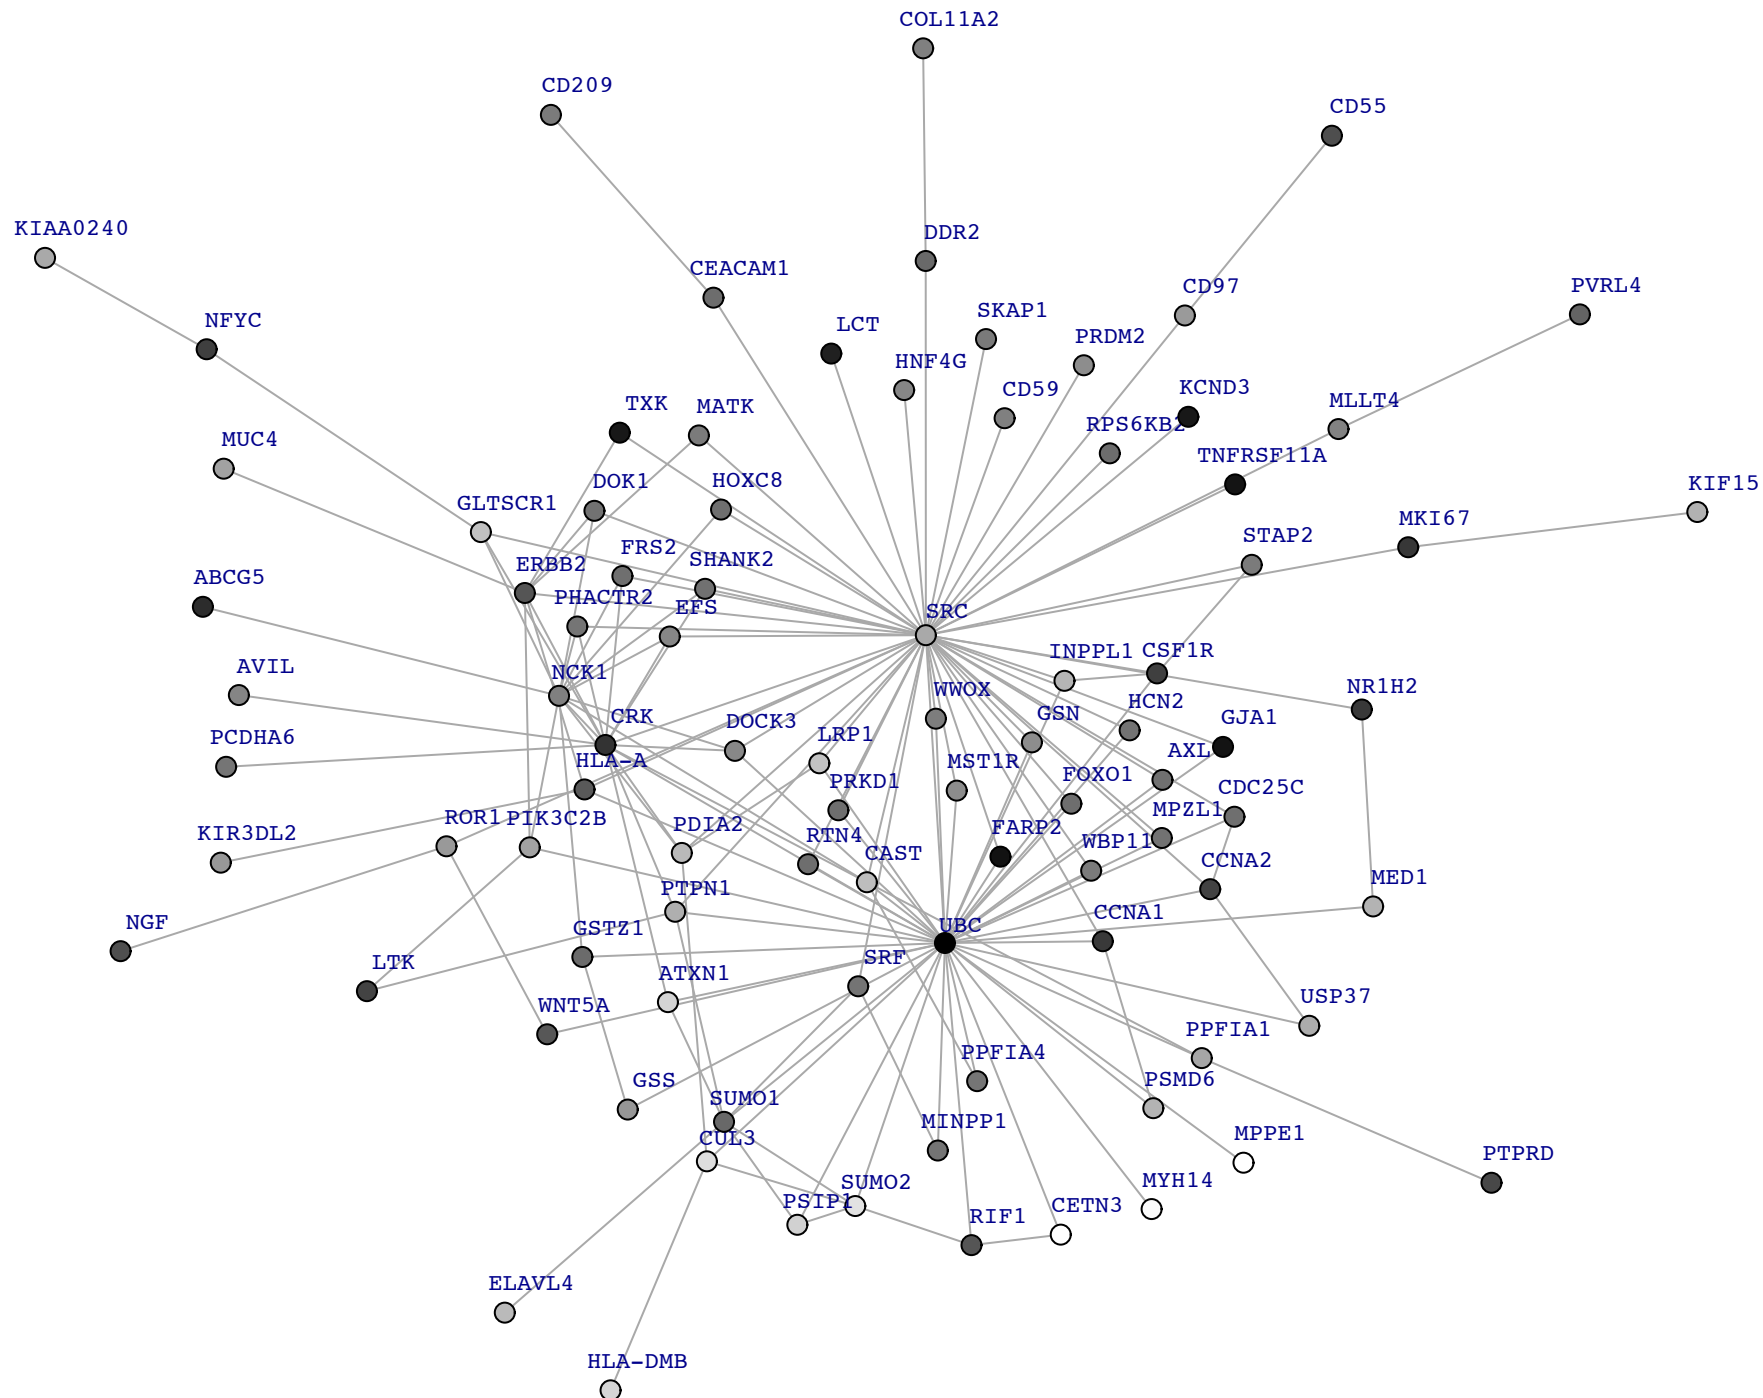

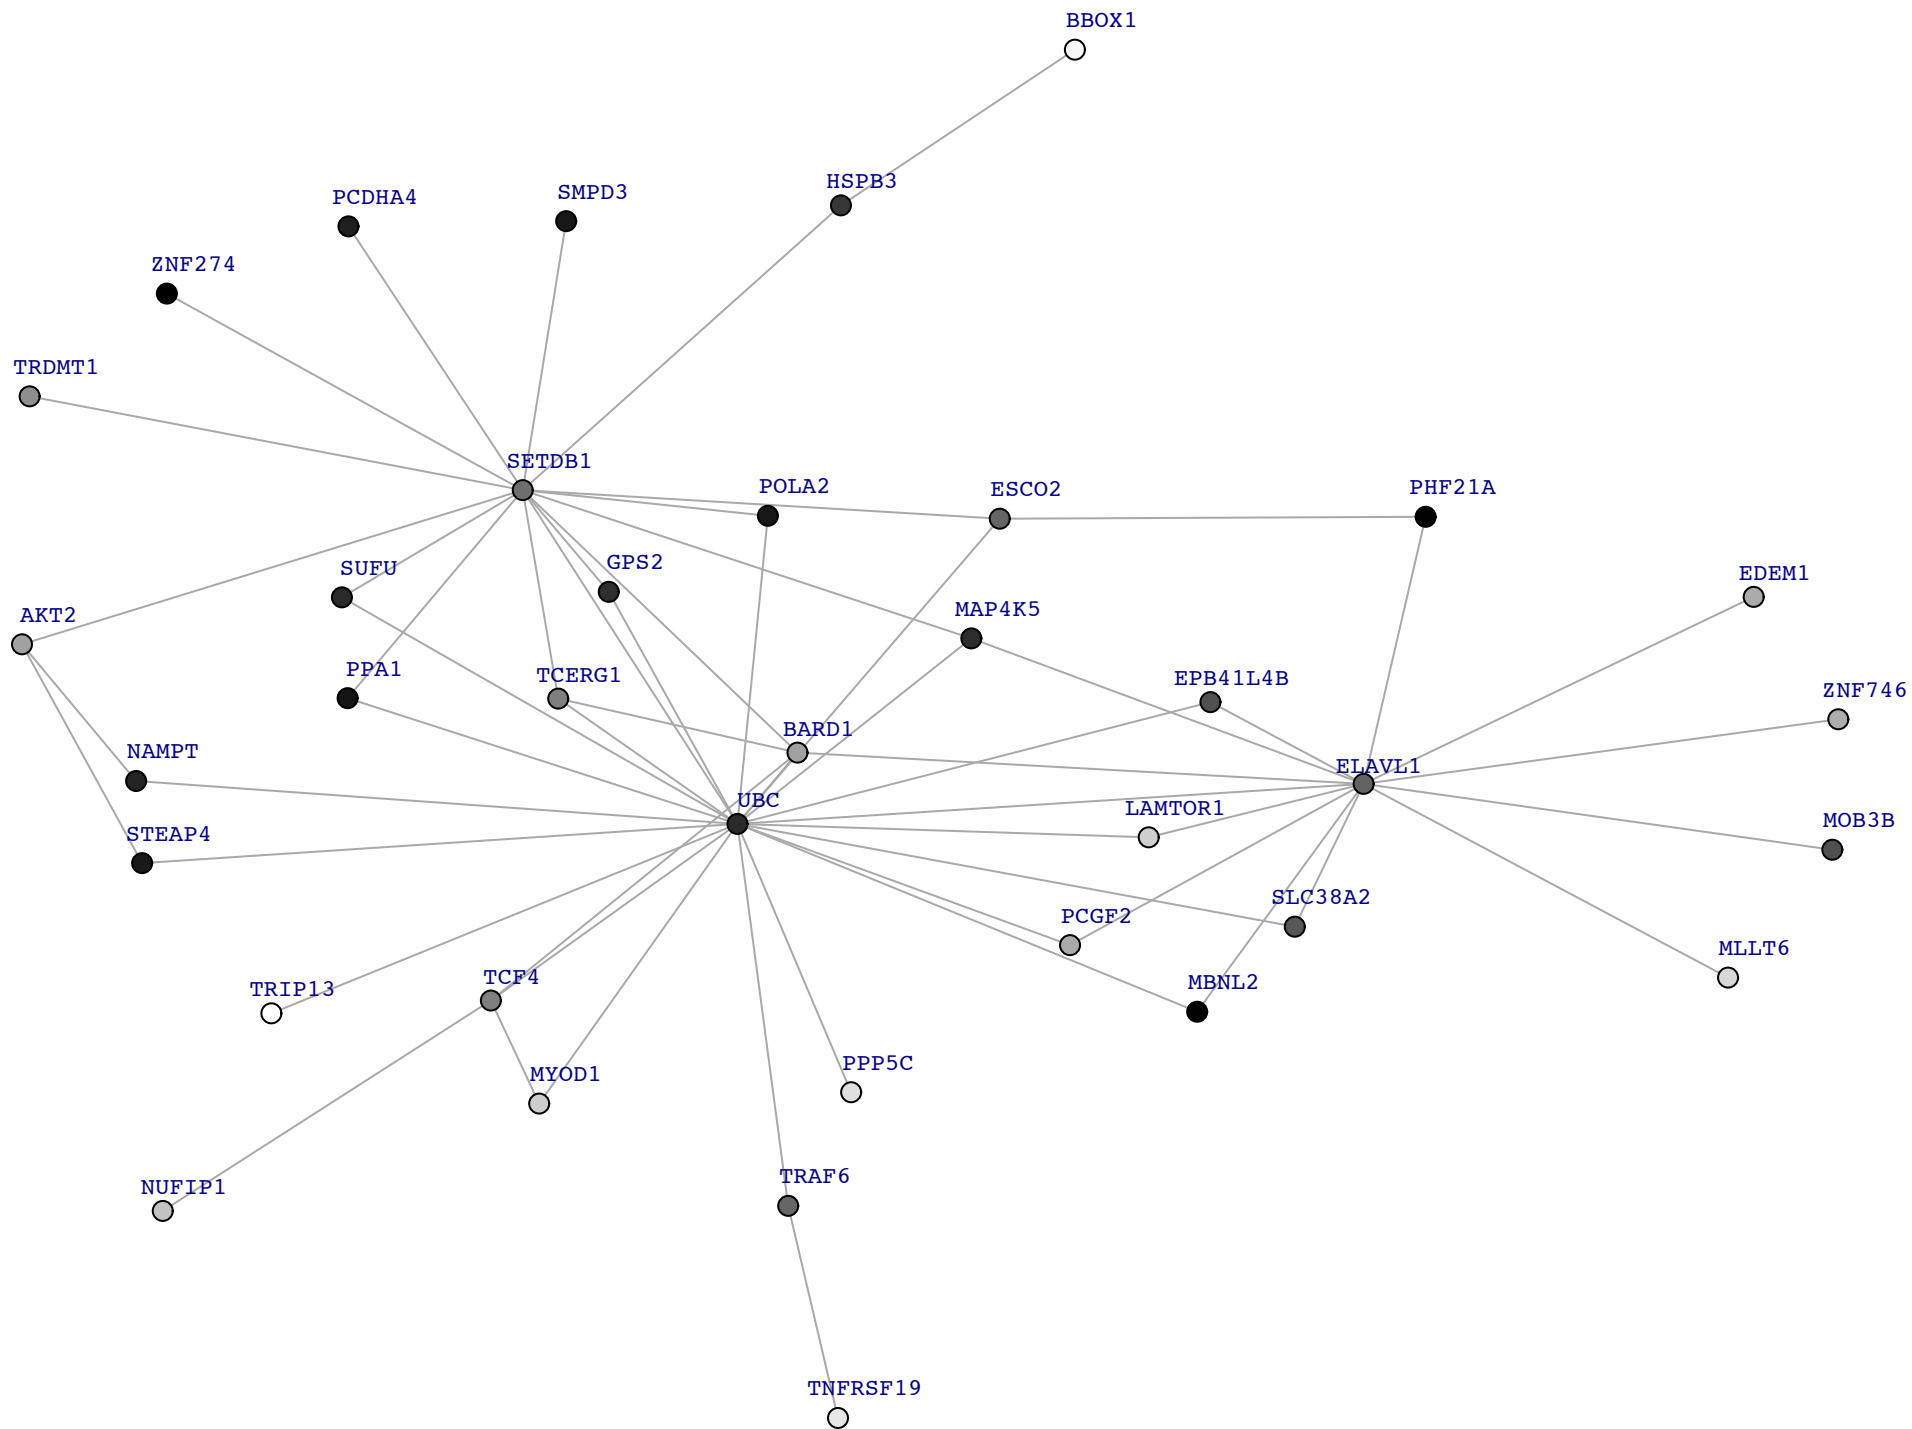

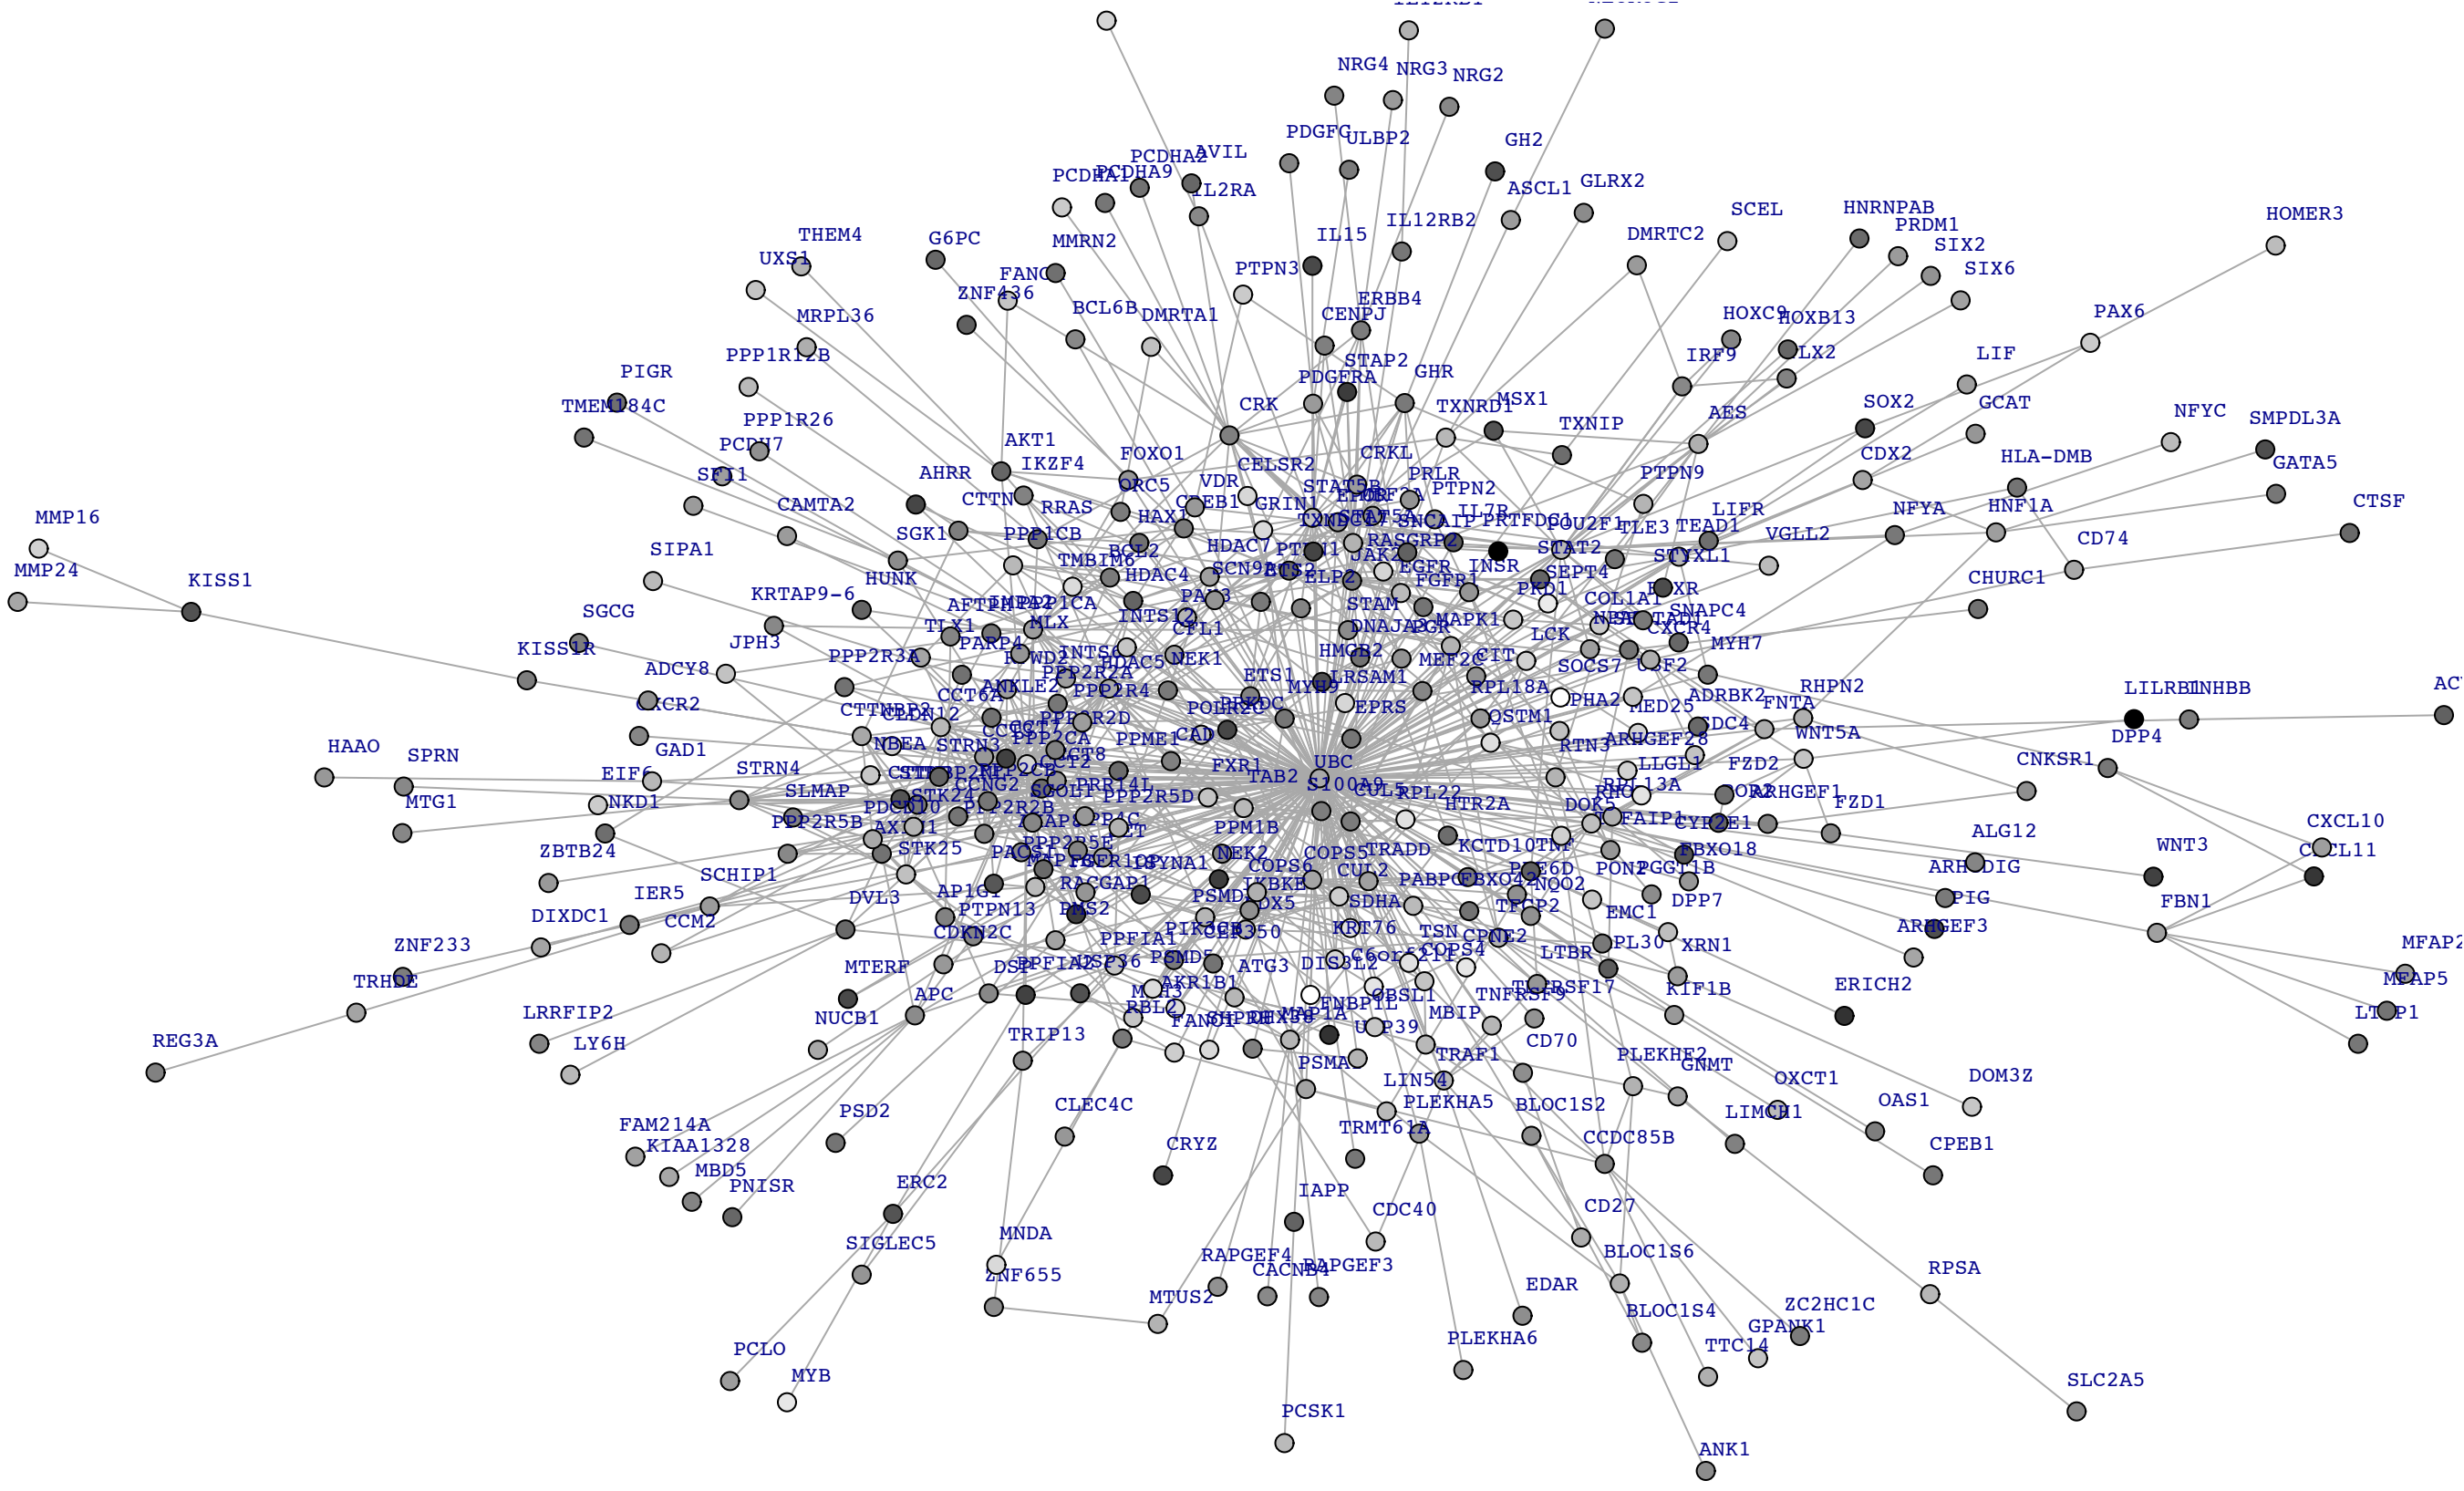

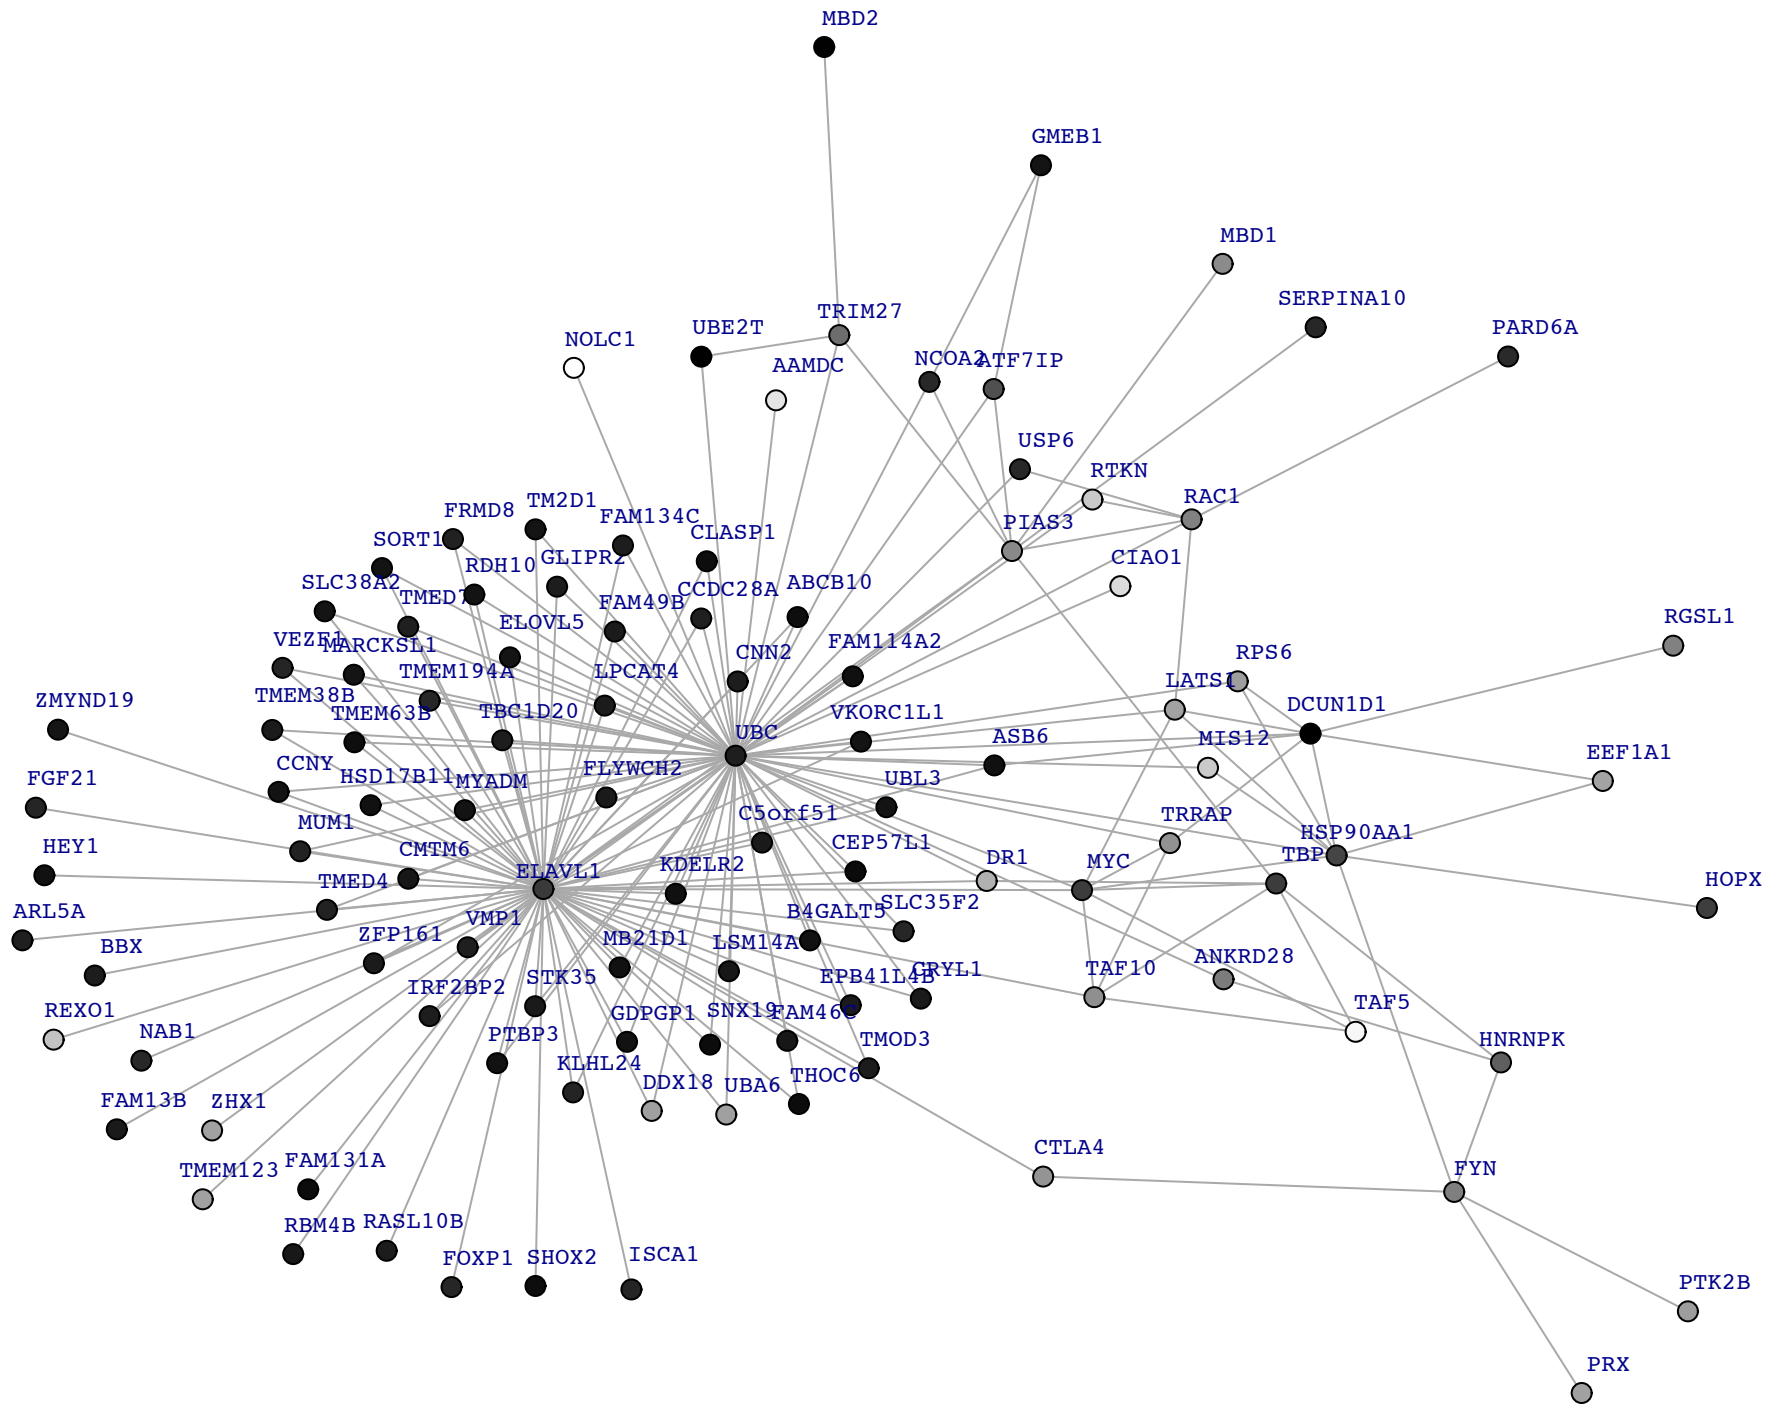

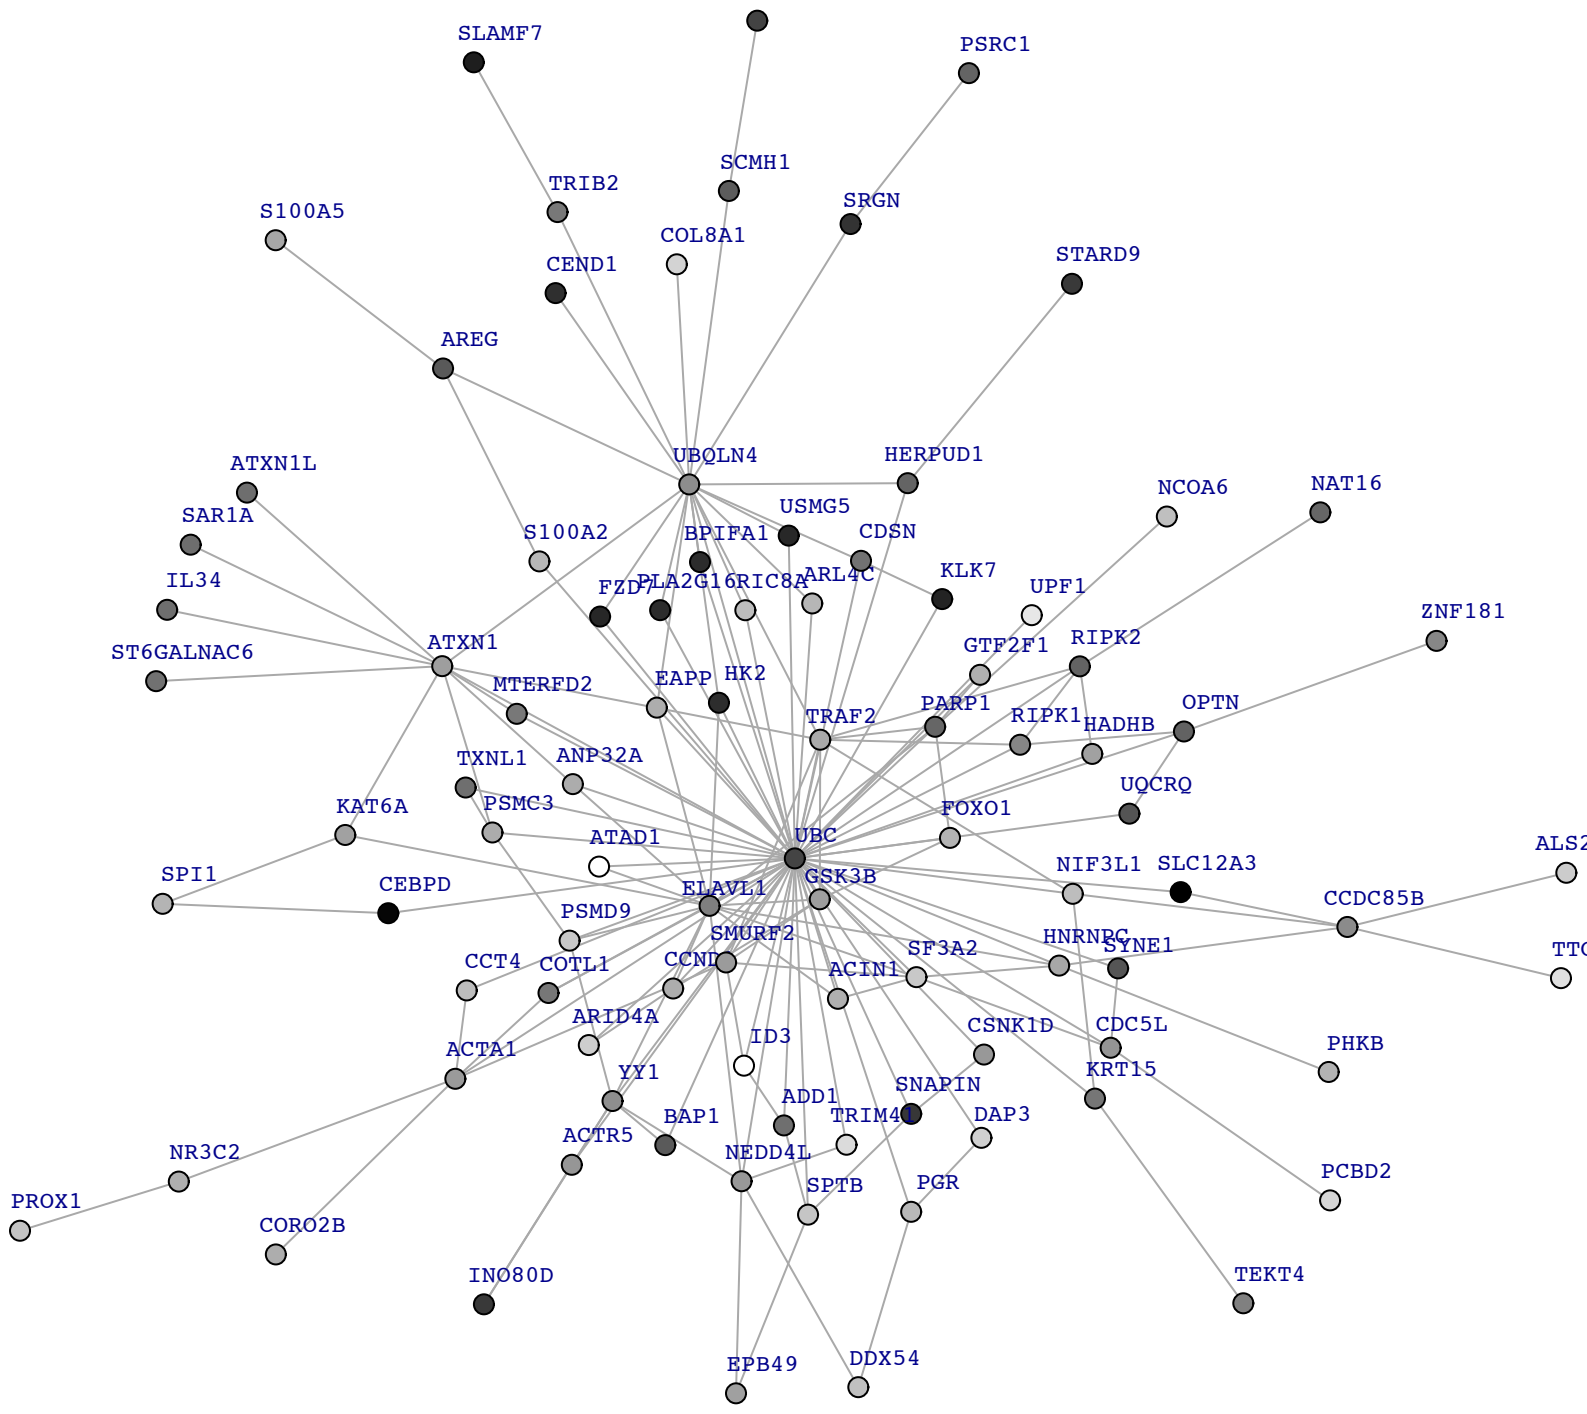

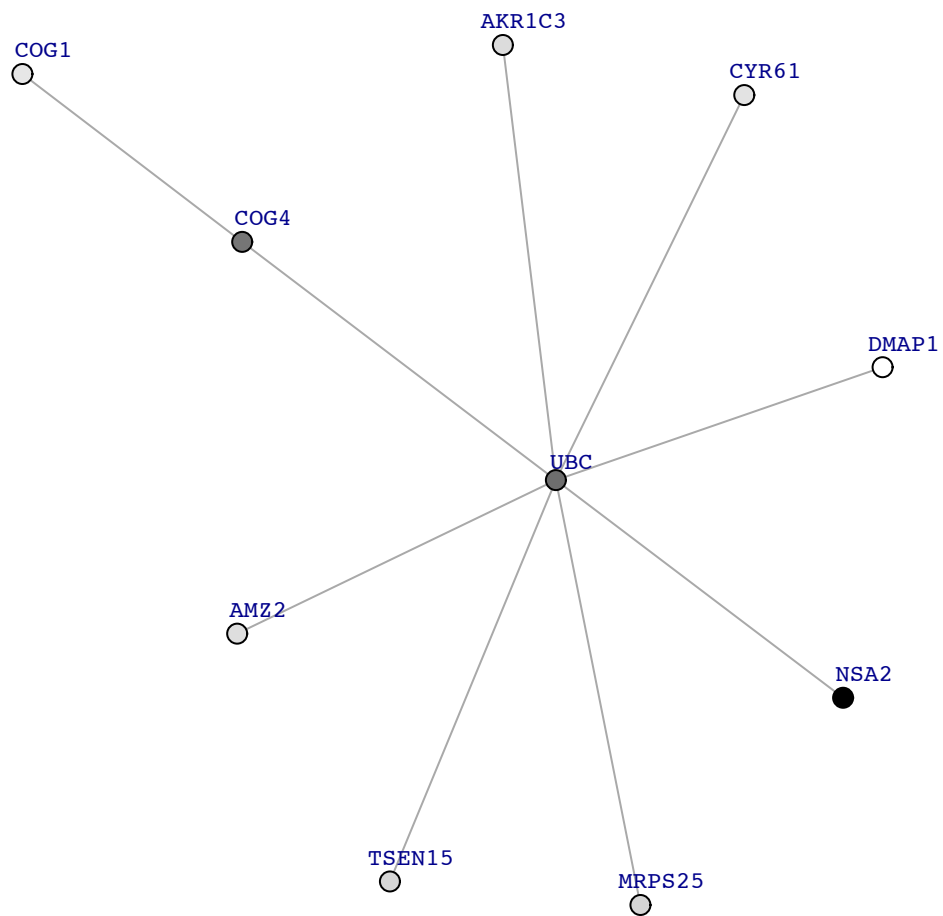

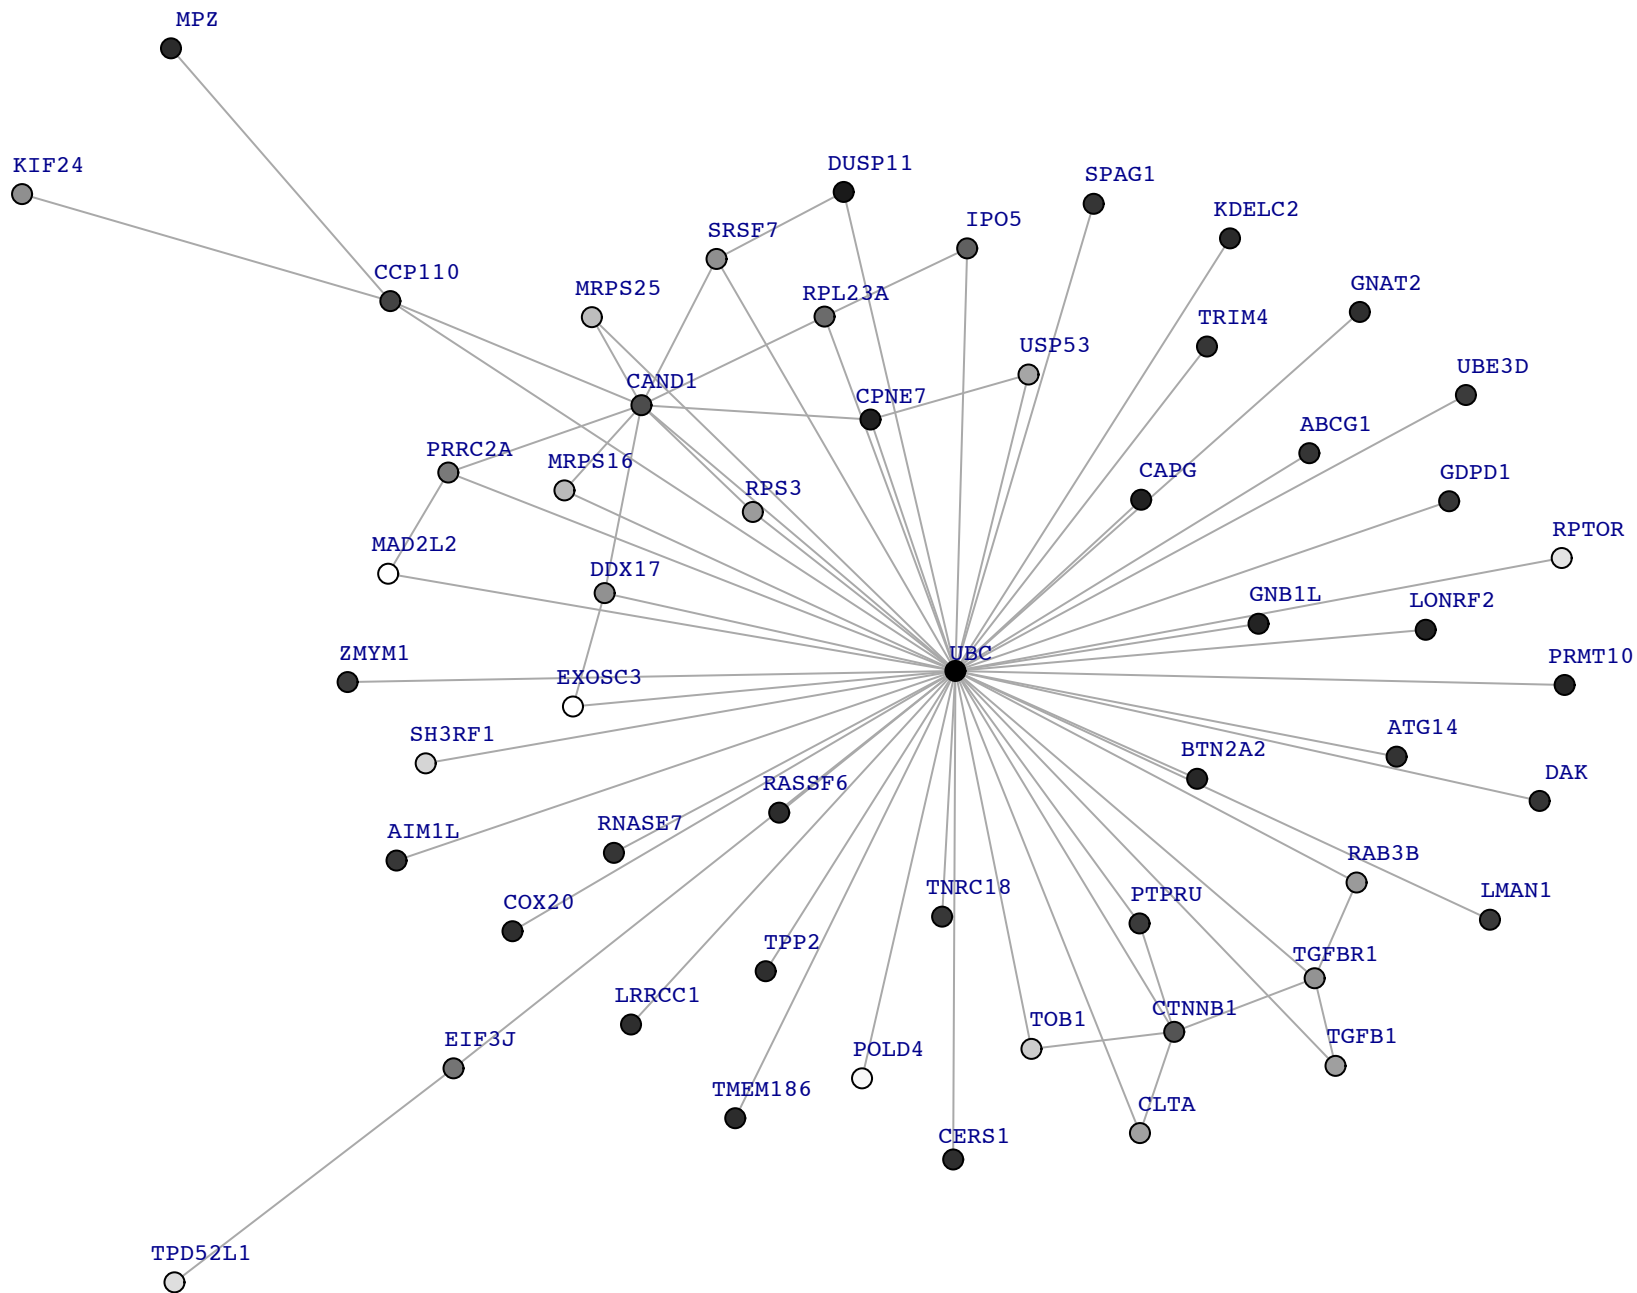

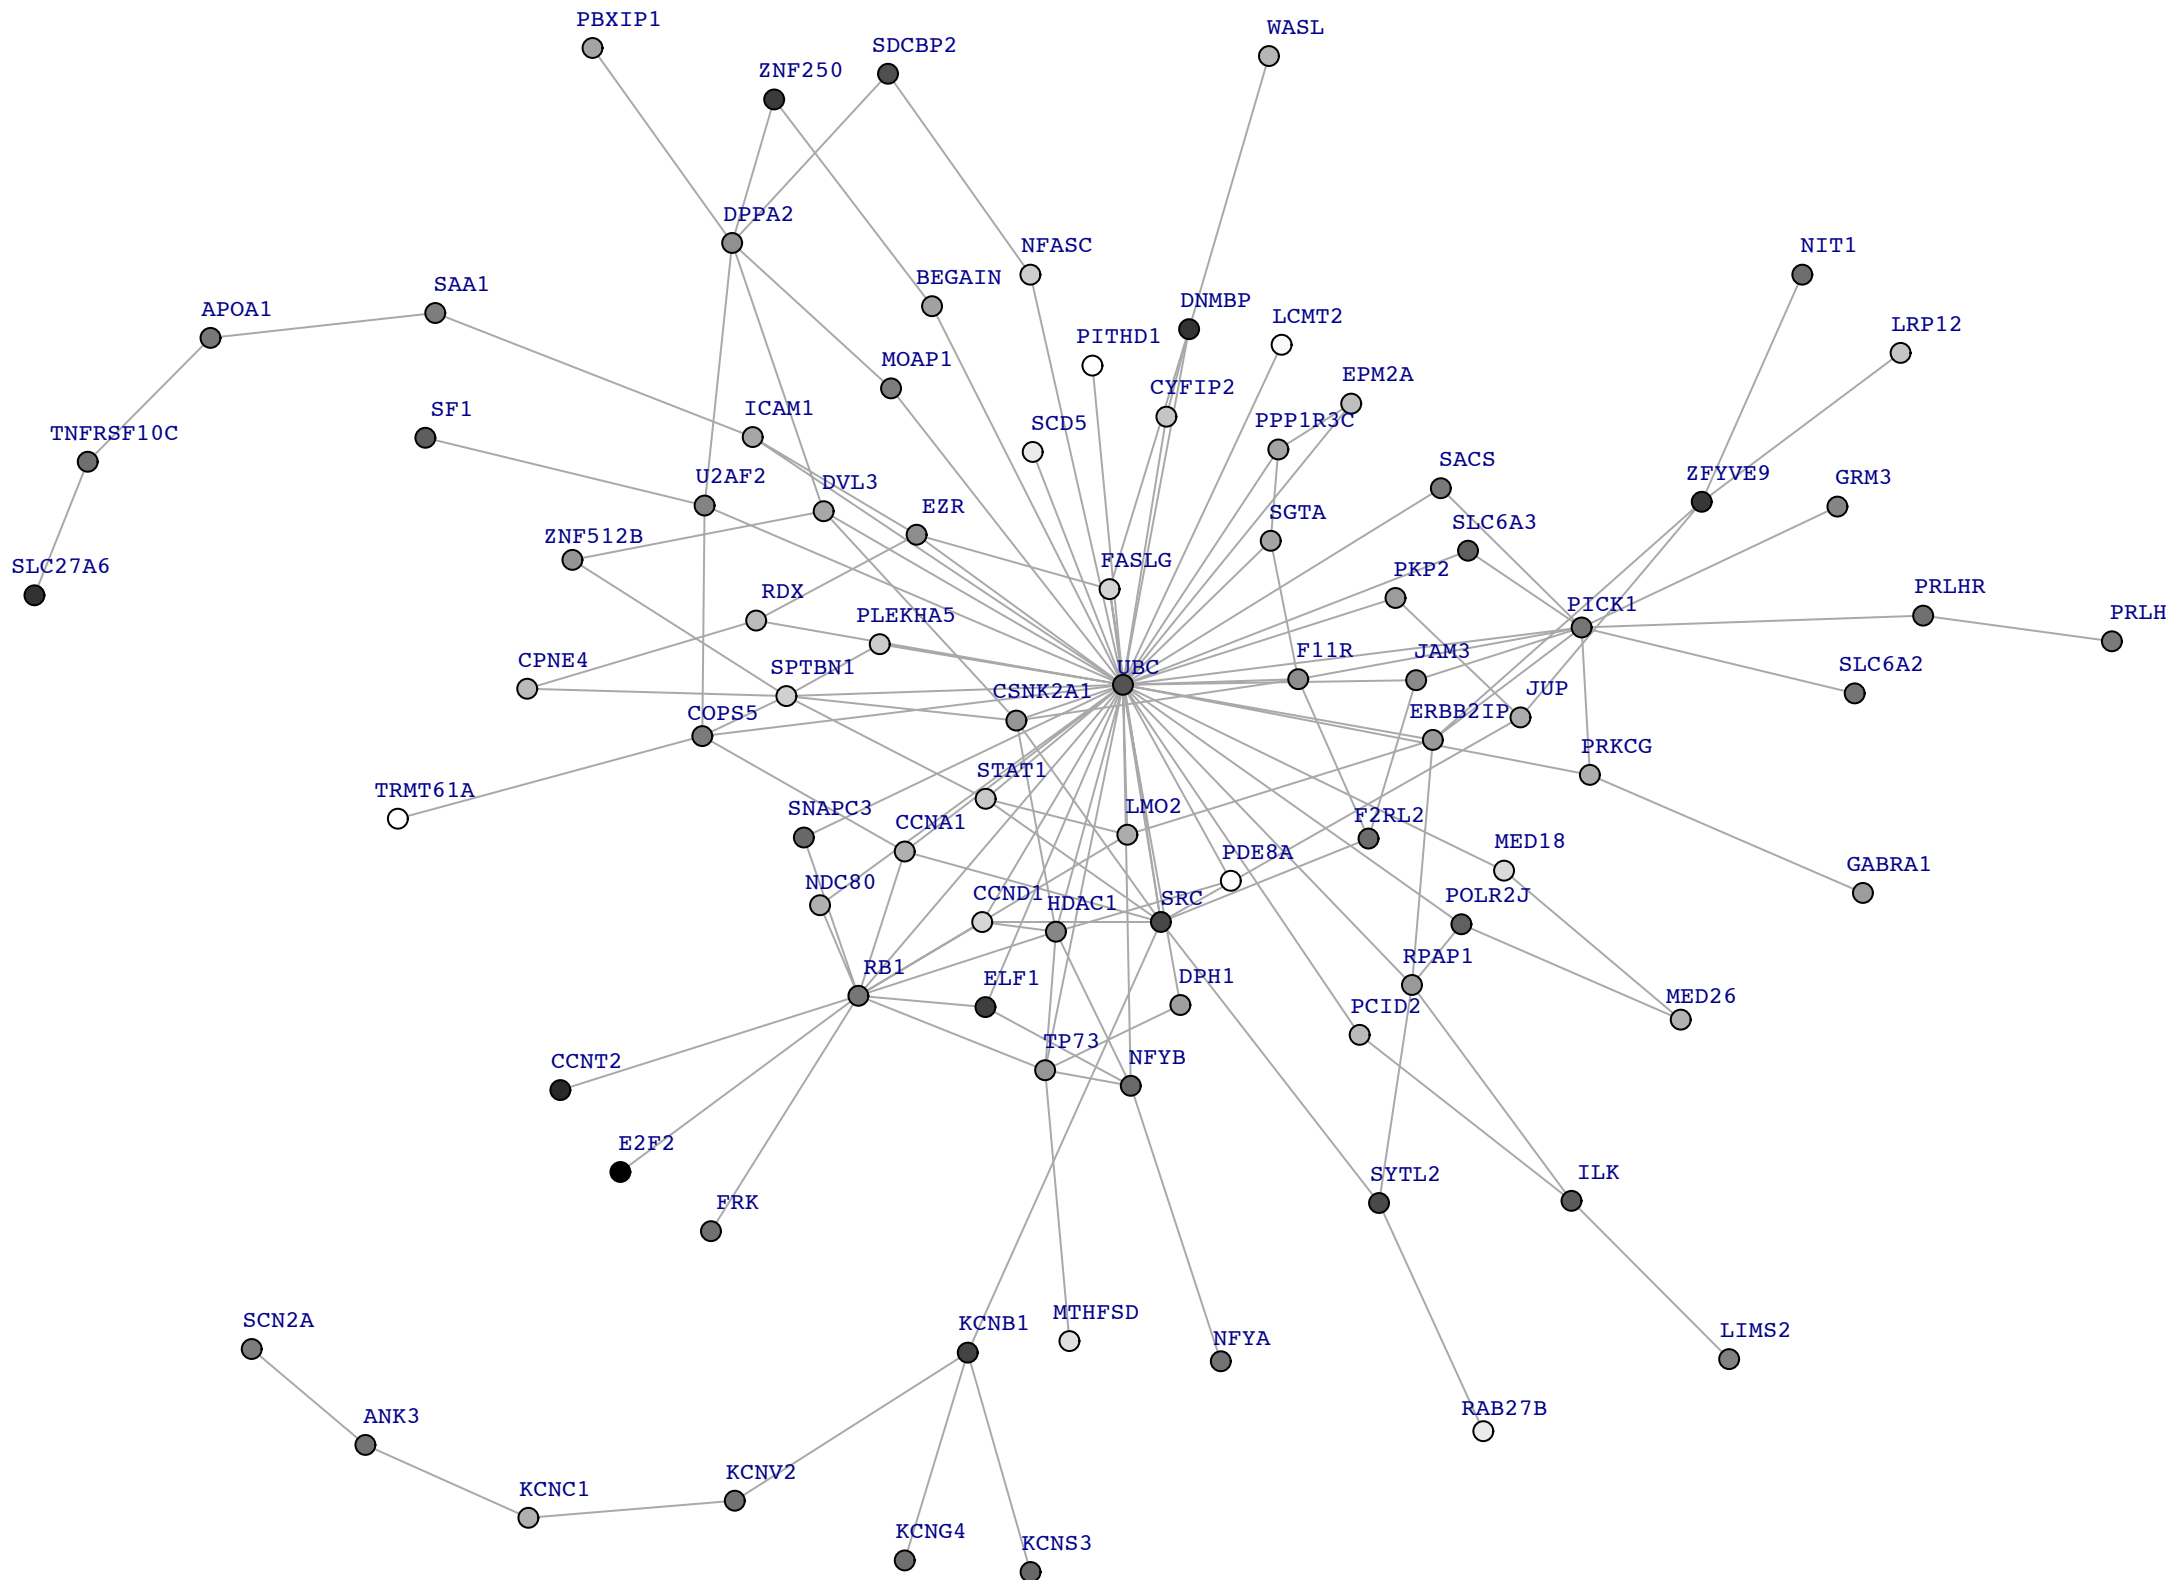

Supplement: Supplementary file 1 [file 1 › 000365589_sm_Figure_2.pdf]
